# Supplementary material
Source: MDPI journal article supplement (https://www.mdpi.com/2071-1050/15/2/1324)
Supplement: s1 [file s1 › sustainability-2100097-supplementary.pdf]

# Evaluating the Economic Feasibility of Plant Factory Scenarios That Produce Biomass for Biorefining Processes

Heino Pesch \* and Louis Louw

Department of Industrial Engineering, Faculty of Engineering, Stellenbosch University, Stellenbosch 7600, South Africa

\* Correspondence: heinopesch@gmail.com or 18218113@sun.ac.za

## Supplementary Materials

The information provided below is the supplementary information and intermediate data associated with the economic model and economic feasibility analyses which were discussed in the corresponding paper.

### 1. Literature review of key themes and terms for the plant factory system boundary

The expanded terms mentioned in this section were used to develop the conceptual plant factory system boundary and correlate the identified key terms to economic indexes for plant factory systems.

**Table S1.** Plant factory design and operational considerations

| Theme      | Term              | Considerations                                                                   | References                |
|------------|-------------------|----------------------------------------------------------------------------------|---------------------------|
| Design     | Structural design | Determining the degree of environmental insulation required                      | [1–8]                     |
|            |                   | Determination of plant factory production capacity and ease of capacity increase | [5,9–13]                  |
|            |                   | Construction material use and environmental impact of intended development       | [2,6,14–20]               |
|            | Technology        | Energy generation infrastructure                                                 | [21–31]                   |
|            |                   | Water capture- and utilisation infrastructure                                    | [1,19,32–36]              |
|            |                   | Determination of automated environmental control system complexity               | [5–7,37–40]               |
|            |                   | Correlation between design complexity and plant factory biomass performance      | [1,3,5,6,14,31,41–43]     |
|            |                   | Selection of physical labour harvesting or automation                            | [5,6,10,13,39,42,44,45]   |
| Operations | Resource inputs   | Selection of grid energy or renewable energy sources                             | [5,19,27,31,33,46–50]     |
|            |                   | Water resource management                                                        | [1,35,36,39,51,52]        |
|            |                   | Determination of CO <sub>2</sub> enrichment levels                               | [2,7,10,53–58]            |
|            |                   | Selection of appropriate land                                                    | [10,15,17,18,36,54,59–61] |
|            |                   | Selection of fertiliser, pesticide and seed suppliers                            | [5,10,36,53,61–65]        |
|            | Resource outputs  | Determining emissions and waste quantities                                       | [2,10,66–69]              |
|            |                   | Plant factory product storage requirements                                       | [8,10,67,70–72]           |

**Table S2.** Supply chain considerations as part of a plant factory system boundary

| Theme        | Term                  | Considerations                                                                                                                 | References              |
|--------------|-----------------------|--------------------------------------------------------------------------------------------------------------------------------|-------------------------|
| Supply chain | Network configuration | Plant factory site numbers and locations                                                                                       | [9,73–77]               |
|              |                       | Plant factory supplier locations                                                                                               | [78–82]                 |
|              |                       | Plant factory product market locations                                                                                         | [8,9,72,78,81–84]       |
|              | External industries   | Identification of external waste streams for valorisation                                                                      | [28,69,71,84–87]        |
|              |                       | Determining the degree of vertical integration of feedstock production and processing within the plant factory system boundary | [88–92]                 |
|              |                       | Selection of biomass which can service multiple markets                                                                        | [77,83,93–95]           |
|              | Uncertainty           | Determination of supply chain performance                                                                                      | [73,96–99]              |
|              |                       | Transportation logistics for produced biomass                                                                                  | [9,82,84,96,100,101]    |
|              |                       | Regional policies concerning biomass production and bioprocessing industries                                                   | [60,73,80,84,94–96,102] |

**Table S3.** Biorefining market considerations for plant factory projects

| Theme               | Term               | Considerations                                                                                   | References                |
|---------------------|--------------------|--------------------------------------------------------------------------------------------------|---------------------------|
| Biorefining markets | Biomass selection  | Determination of biomass demand                                                                  | [9,82–84,96,99]           |
|                     |                    | Identification of alternative biomass suppliers                                                  | [9,83,96,103,104]         |
|                     |                    | Required chemical and physical properties                                                        | [9,16,56,73,81,83,105]    |
|                     | Downstream markets | Selection of end-products and appropriate co-derived intermediate products from produced biomass | [77,81,83,97,103,106,107] |
|                     |                    | Calculation of intermediate and end-product prices                                               | [73,81,82,84,103,108,109] |

## 2. Economic model equations

This section provides the intermediate plant factory economic model equations used to calculate CAPEX and OPEX costs for each of the investigated plant factory scenarios.

### 2.1 Capital Expenditure (CAPEX) calculations

The construction cost in Equation (S1) was divided into structure cost and real estate cost. The real estate cost was omitted from further calculations as its value was too heavily dependent on the selection of a specific location for the plant factory scenarios.

$$\text{Construction cost} = \text{Structure cost} + \text{Real estate} \quad (\text{S1})$$

The structure cost was calculated using the defined plant factory floorspace breakdown in Table 3 and the report by Turner & Townsend [110] which specified the cost of construction in South Africa. The cost calculations are shown in Table S6. The equipment cost in Equation (S2) was divided into equipment components which were costed individually for each of the plant factory scenarios.

$$\text{Equipment cost} = \text{Grow system module} + \text{Lift and transport} + \text{Fertigation system} + \text{Monitor and control system} + \text{Heating, ventilation and air conditioning (HVAC) system} \quad (\text{S2})$$

The individual costing of the equipment components is shown in Table S7 to Table S9. The depreciation of the structure and equipment was also included in Equation (S3) as it is often ignored when evaluating the economic feasibility of plant factories [111].

$$\text{Depreciation per year} = (\text{Structure cost})/(\text{Structure lifespan}) + (\text{Equipment cost})/(\text{Equipment lifespan}) \quad (\text{S3})$$

The depreciation cost was calculated individually for each of the equipment components as they had different lifespans.

## 2.2 Operating Expenditure (OPEX) calculations

Equation (S4) shows that the variable cost, also cost of goods sold (COGS), included direct labour costs, total electricity costs, water, fertiliser, grow media, seeds and additional CO<sub>2</sub>.

$$\text{COGS} = \text{Direct labour} + \text{Electricity} + \text{Water} + \text{Fertiliser} + \text{Grow media} + \text{Seeds} + \text{CO}_2 \quad (\text{S4})$$

The values of the COGS components used in the simulations are tabulated in Table S10 to Table S16. The direct labour cost, Equation (S5), was a function of salary rates, total labourers and working hours per year for each labourer.

$$\text{Direct labour cost} = \text{Salary rates} \times \text{Total labourers} \times \text{labour hours per year for each labourer} \quad (\text{S5})$$

The wage rates for direct labour positions and the labourer to cultivation area estimates are also shown in Table S10. The electricity required to power the light emitting diode (LED) lighting system was calculated with Equation (S6) and took into account the variations in photoperiods between crops, the required number of LED lights to achieve the desired canopy light intensity and the variations in electricity tariffs.

$$\text{Annual electricity cost for LED lighting} = \text{Number of LED lights} \times \text{Watts per light} \times \text{Photoperiod} \times \text{Operational days per year} \times \text{Electricity tariff} \quad (\text{S6})$$

Table S11 summarises the technical specifications of the LED lighting system used in the model and summarises the differences of the LED lighting system for each of the crops being investigated. The energy tariff was estimated using the wholesale electricity pricing system (WEPS) as published by the South African electricity public utility, Eskom [112]. The electricity tariff structure in Equation (S7) consisted of an active energy charge, ancillary service charge, electrification and rural network subsidy charge and affordability subsidy charge.

$$\text{Electricity tariff} = \text{Active energy charge} + \text{Ancillary service charge} + \text{Electrification and rural network subsidy charge} + \text{Affordability subsidy charge} \quad (\text{S7})$$

The WEPS pricing structure is tabulated in Table S12 with active energy charge rates for off-peak and standard times. Equation (S8) was used to calculate the total cooling load required for the plant factory grow area and considered

heat removal from the ventilation air, LED lighting systems, plant evapotranspiration and heat gained from the environment.

$$\text{Heat removed} = \text{Heat removed from ventilation air} + \text{Heat from LED lights} + \text{Heat from plant evapotranspiration} + \text{Heat gained from the environment} \quad (\text{S8})$$

The components of Equation (S8) were calculated using Equation (S9) to Equation (S12) and are shown in Table S13:

$$\text{Heat removed from ventilation air} = \text{Heat capacity of air} \times \text{mass flow rate of air} \times (\text{Average ambient air temperature} - \text{Average indoor air temperature}) \quad (\text{S9})$$

$$\text{Heat from LED lights} = \text{Percentage heat generation from LEDs} \times \text{Power per LED bar} \times \text{Light bars required for growing area} \quad (\text{S10})$$

$$\text{Heat from plant evapotranspiration} = (\text{Annual water requirement} \times \text{Water density} \times \text{Heat of vaporisation}) / (\text{Total seconds per year of heat removal}) \quad (\text{S11})$$

$$\text{Heat gained from the environment} = \text{Heat transfer coefficient} \times \text{Surface area of growing room walls} \times (\text{Average ambient air temperature} - \text{Average indoor air temperature}) \quad (\text{S12})$$

The annual electricity demand was calculated by using Equation (S13) and by considering the total operational hours per year of the plant factory. The electricity demand of LED heat removal was based on daily photoperiods and the heat removal associated with ventilation air, evapotranspiration and the environment were calculated on a 24 hour per day basis.

$$\text{Electricity required} = (\text{Heat removed}) / (\text{Coefficient of performance (COP)}) \quad (\text{S13})$$

The cost of water demand, Equation (S14), can be related to evapotranspiration rates of crops. This economic model used the Blaney-Criddle equation, Equation (S15), to estimate the water demand of the plant factory scenarios [113].

$$\text{Water cost} = \text{Evapotranspiration rate} \times \text{Total growing area} \times \text{Water tariff} \quad (\text{S14})$$

The results obtainable from the Blaney-Criddle equation were assumed to be sufficiently accurate for the complexity of this model. The water tariff and evapotranspiration values are tabulated in Table S14, along with the fertiliser concentration and price data.

$$\text{Evapotranspiration rate} = \text{Crop factor} \times \text{Mean daily percentage of annual daytime hours} \times (0.46 \times \text{Mean daily temperature} + 8) \quad (\text{S15})$$

The annual fertiliser cost, Equation (S16), was based on the annual water requirement, fertiliser concentration and fertiliser selling price.

$$\text{Fertiliser cost} = \text{Water required} \times \text{Fertiliser concentration} \times \text{Fertiliser price} \quad (\text{S16})$$

The grow media cost, Equation (S17), was calculated by considering the total amount of plants being cultivated each year and the amount of times the grow media could be reused before disposal. Rockwool was selected as the grow media and information regarding the substrate is tabulated in Table S15.

$$\text{Grow media cost} = (\text{Plants grown per year})/(\text{Grow media uses}) \times \text{Grow media price} \quad (\text{S17})$$

Similarly, the annual seed requirement, Equation (S18), was based on the projected amounts of plants being cultivated each year and the germination rate.

$$\text{Seed cost} = \text{Plants grown per year} \times 100/(\text{Germination rate}) \times \text{Seed price} \quad (\text{S18})$$

Lastly, the supplemental CO<sub>2</sub> flow rate was calculated in Equation (S19) by elevating the CO<sub>2</sub> concentration in the ventilation air to the desired level, prior to entry into the grow room, and by compensating for the CO<sub>2</sub> uptake rate of the cultivated plants in the plant factory to ensure the desired level of CO<sub>2</sub> in the cultivation space.

$$\text{CO}_2 \text{ flow rate} = \text{Elevated CO}_2 \text{ levels in the ventilation air} + \text{CO}_2 \text{ uptake of cultivated plants} \quad (\text{S19})$$

The CO<sub>2</sub> uptake rate in the plant factory space was assumed [11,71] and the CO<sub>2</sub> that was required to supplement the ventilation air was calculated using Equation (S20).

$$\text{CO}_2 \text{ required for ventilation air} = \text{Air flow rate} \times (\text{Desired CO}_2 \text{ levels in parts per million} - \text{Ambient CO}_2 \text{ levels in parts per million})/(10^6) \quad (\text{S20})$$

The CO<sub>2</sub> uptake rates, intermediate calculations and supplementing data are shown in Table S16 for each of the investigated crops.

### 3. Economic model assumptions and general information

This section includes the main assumptions and general information which was used to populate the plant factory economic model.

**Table S4.** Economic model assumptions

| nr.            | Assumption                                                                                                                                                                    | Motivation                                                                                                                                                                                                               |
|----------------|-------------------------------------------------------------------------------------------------------------------------------------------------------------------------------|--------------------------------------------------------------------------------------------------------------------------------------------------------------------------------------------------------------------------|
| <b>General</b> |                                                                                                                                                                               |                                                                                                                                                                                                                          |
| 1              | Constant plant factory footprint size throughout scenarios                                                                                                                    | Constrains the scenarios and makes direct comparisons easier                                                                                                                                                             |
| 2              | Real estate cost omitted                                                                                                                                                      | Location-specific and constant throughout the scenarios                                                                                                                                                                  |
| 3              | Plant factory environmental conditions and associated crop yields based on literature data                                                                                    | Linking the biomass yields and cultivating conditions in the model provides a measure of certainty to the revenue calculations                                                                                           |
| 4              | Currency exchange rates taken as of April 2022<br>South African Rand/Dollar (US) = 14.85<br>South African Rand /Dollar (Canadian) = 11.88<br>South African Rand /Euro = 16.16 | Provides consistency throughout the study                                                                                                                                                                                |
| 5              | Loan repayments and tax not considered                                                                                                                                        | Ease of calculations                                                                                                                                                                                                     |
| 6              | Favourable cultivation area to labourer ratio assumed                                                                                                                         | High-tech plant factory facility can be designed to require minimal physical input                                                                                                                                       |
| 7              | Plant factory assumed operational 335 days per year                                                                                                                           | -                                                                                                                                                                                                                        |
| 8              | Single-value prices represented with a price range of 20% uncertainty.                                                                                                        | -                                                                                                                                                                                                                        |
| <b>CAPEX</b>   |                                                                                                                                                                               |                                                                                                                                                                                                                          |
| 9              | Plant factory structure cost approximated using published construction costs of similar structures                                                                            | -                                                                                                                                                                                                                        |
| 10             | Plant factory racks have adjustable tray heights and do not impact CAPEX calculations                                                                                         | -                                                                                                                                                                                                                        |
| 11             | Plant factory footprint breakdown remains constant                                                                                                                            | Footprint components are based on literature and not varied for simplicity                                                                                                                                               |
| 12             | Lift and transport car (R100,000) included for each scenario                                                                                                                  | Helps with direct labour activities and its inclusion motivates the favourable labourer to cultivation area ratios which are used in the model                                                                           |
| 13             | Plant factory grow module price includes trays, racks, piping, pumps and the LED lighting system                                                                              | Cost estimates of the individual components were difficult to obtain and instead a cost per cultivation area price was calculated using price estimates of a plant factory module with the specified components included |
| 14             | The monitor and control system consisted of four (4-in-1) sensors per level per vertical farming rack                                                                         | Assumed to be adequate sensor equipment for a 600 m <sup>2</sup> footprint growing area                                                                                                                                  |
| 15             | The monitor and control system consisted of four temperature, humidity and CO <sub>2</sub> controllers and one lighting controller per level per rack                         | Assumed to be adequate environmental control equipment for a 600 m <sup>2</sup> footprint growing area                                                                                                                   |
| 16             | The cost of the HVAC system was estimated as 4% of the total plant factory equipment cost                                                                                     | -                                                                                                                                                                                                                        |

|                  |                                                                                                                                                                                               |                                                                                                                         |
|------------------|-----------------------------------------------------------------------------------------------------------------------------------------------------------------------------------------------|-------------------------------------------------------------------------------------------------------------------------|
| 17               | The high-wire cultivation module cost was approximated as a one level hydroponic tray system                                                                                                  | -                                                                                                                       |
| 18               | High-wire row takes up similar cultivation space to a vertical farming rack                                                                                                                   | Conservative estimate for ease of calculations                                                                          |
| 19               | One high-wire row has a sensor density equal to two levels of a vertical farming rack                                                                                                         | -                                                                                                                       |
| 20               | The nutrient delivery system consists of one commercially available fertigation system and four batch tanks as liquid fertiliser reservoirs                                                   | -                                                                                                                       |
| <b>OPEX</b>      |                                                                                                                                                                                               |                                                                                                                         |
| 21               | Insurance and rent excluded                                                                                                                                                                   | Ease of calculations                                                                                                    |
| 22               | Peak energy load times are avoided to lower electricity tariff                                                                                                                                | -                                                                                                                       |
| 23               | Elevated CO <sub>2</sub> levels only provided during photoperiod                                                                                                                              | -                                                                                                                       |
| 24               | The high-wire module CO <sub>2</sub> uptake and water requirements are based on the total vertical cultivation area                                                                           | -                                                                                                                       |
| 25               | Grow slabs can hold three vines each in the high-wire module                                                                                                                                  | -                                                                                                                       |
| 26               | Lighting and HVAC energy consumption approximated as 98% of total energy demand                                                                                                               | -                                                                                                                       |
| 27               | Ventilation rate remains constant at nine times per day                                                                                                                                       | -                                                                                                                       |
| 28               | Moneymaker and dwarfed tomato seed prices assumed same as micro-tom tomato seeds                                                                                                              | Lack of available data                                                                                                  |
| 29               | Grow media reusable four times before disposal is required                                                                                                                                    | -                                                                                                                       |
| 30               | Direct labour hours are twenty per week                                                                                                                                                       | -                                                                                                                       |
| 31               | Heat generated from LED lighting system is equal to 50% of the energy demand of the system                                                                                                    | -                                                                                                                       |
| 32               | Heating and cooling load of the HVAC system is only based on the growing area space                                                                                                           | -                                                                                                                       |
| 33               | Growing area is highly insulated with a 0.3 W/(m <sup>2</sup> .K) heat transfer coefficient                                                                                                   | -                                                                                                                       |
| 34               | Growing area walls have a 400 m <sup>2</sup> surface area                                                                                                                                     | -                                                                                                                       |
| 35               | HVAC system has a coefficient of performance (COP) of 3                                                                                                                                       | -                                                                                                                       |
| <b>Crop data</b> |                                                                                                                                                                                               |                                                                                                                         |
| 36               | Fresh weight biomass consists of 75 wt% moisture                                                                                                                                              | -                                                                                                                       |
| 37               | Miracle berry value related to miraculin content                                                                                                                                              | -                                                                                                                       |
| 38               | Cultivation periods used in the model are considered as days after transplanting                                                                                                              | Nursery cultivation is excluded as it does not share the same growing space as the transplanted biomass                 |
| 39               | Conventional tobacco cultivation in a hydroponic system is approximated using open-field tobacco yields, plant dimensions, planting densities and cultivation periods of the Solaris cultivar | Ease of calculation                                                                                                     |
| 40               | Artemisinin accumulation does not influence biofuel production using the same tobacco feedstock                                                                                               | -                                                                                                                       |
| 41               | Artemisinin accumulation does not inhibit growth of the host plant                                                                                                                            | -                                                                                                                       |
| 42               | Transgenic tobacco and dwarf variants are both cultivated in five level vertical growing racks                                                                                                | For ease of calculations, the difference in size is reflected in planting density and not additional cultivation layers |
| 43               | Transgenic tobacco and dwarf variant planting densities based on lettuce densities                                                                                                            | Similar plant dimensions                                                                                                |

|    |                                                                                                            |   |
|----|------------------------------------------------------------------------------------------------------------|---|
| 44 | Cannabis evapotranspiration rates assumed                                                                  | - |
| 45 | The CO <sub>2</sub> uptake rate in a plant factory is kept at 4-6 g/m <sup>2</sup> grow area/h photoperiod | - |

**Table S5.** General information used in the plant factory model

|                                           | Unit                  | Value | Reference |
|-------------------------------------------|-----------------------|-------|-----------|
| <b>Plant factory information</b>          |                       |       |           |
| Grow room air replenish rate              | times/day             | 9     | [11,114]  |
| Grow room volume                          | m <sup>3</sup>        | 2400  | -         |
| Air flow rate                             | m <sup>3</sup> /h     | 900   | -         |
| Grow room surface area                    | m <sup>2</sup>        | 400   | -         |
| Grow room walls heat transfer coefficient | W/(m <sup>2</sup> .K) | 0.3   | Assumed   |
| <b>Meteorological information</b>         |                       |       |           |
| Average ambient day temperature           | °C                    | 25    | [115]     |
| Average ambient night temperature         | °C                    | 15    | [115]     |
| Ambient CO <sub>2</sub> by volume         | ppm                   | 400   | Assumed   |
| <b>Heat transfer properties</b>           |                       |       |           |
| Heat of vaporisation for water at 25°C    | kJ/kg                 | 2442  | -         |
| Density of water at 25°C                  | kg/m <sup>3</sup>     | 997   | -         |
| Heat capacity of air at 25°C              | kJ/(kg.K)             | 1.005 | -         |
| Density of air at 25°C                    | kg/m <sup>3</sup>     | 1.184 | -         |
| Density of CO <sub>2</sub> at 25°C        | kg/m <sup>3</sup>     | 1.81  | -         |
| Coefficient of performance                | -                     | 3     | Assumed   |

#### 4. Economic model CAPEX intermediate data

This section provides all the supplementary information and calculations associated with the plant factory CAPEX calculations of the developed economic model.

**Table S6.** The plant factory footprint (1000 m<sup>2</sup>) components equated to typical structure construction costs in South Africa

| Plant factory component                | Space breakdown (%) | Turner & Townsend equivalent space | Construction cost (R/m <sup>2</sup> ) | Reference |
|----------------------------------------|---------------------|------------------------------------|---------------------------------------|-----------|
| Germination and nursery                | 15                  | High-tech laboratory/factory       | 9,100                                 | [110]     |
| Growth phase bottom layer              | 60                  | Warehouse/factory - basic          | 5,100                                 |           |
| Harvest, packaging and storage         | 15                  | Warehouse distribution centre      | 5,500                                 |           |
| Walkways, offices and ancillary spaces | 10                  | Office - Business park             | 13,000                                |           |
| Total                                  | 100                 | -                                  | -                                     |           |

The grow system infrastructure cost was calculated from price estimates of vertical farming plant factory grow racks with different levels of grow trays [116]. The price estimates are shown in Table S7 and were used to calculate an average cost per vertical farming level per rack. The grow area per grow rack level remained constant at 1.6 m x 20 m.

**Table S7.** Plant factory cost estimates and calculated cost per grow level

| Plant factory grow rack | Grow level | Price estimate (R) | Cost per grow level (R/level) | Included                                                                                                                                                  | Excluded                                                                     | Reference |
|-------------------------|------------|--------------------|-------------------------------|-----------------------------------------------------------------------------------------------------------------------------------------------------------|------------------------------------------------------------------------------|-----------|
| 3816 Plant system       | 3          | 581,756            | 193,919                       | <ul style="list-style-type: none"><li>• Grow racks</li><li>• Grow trays</li><li>• LED lighting</li><li>• Hydroponic piping</li><li>• Water pump</li></ul> | <ul style="list-style-type: none"><li>• Fertigation system</li></ul>         | [116]     |
| 5088 Plant system       | 4          | 775,675            | 193,919                       |                                                                                                                                                           | <ul style="list-style-type: none"><li>• HVAC system</li></ul>                |           |
| 6360 Plant system       | 5          | 969,594            | 193,919                       |                                                                                                                                                           | <ul style="list-style-type: none"><li>• Monitor and control system</li></ul> |           |
| 10,176 Plant system     | 8          | 1,717,669          | 214,709                       |                                                                                                                                                           | <ul style="list-style-type: none"><li>• Sensors</li></ul>                    |           |
| 12,270 Plant system     | 10         | 2,124,625          | 212,463                       |                                                                                                                                                           | <ul style="list-style-type: none"><li>• Shipping and installation</li></ul>  |           |
| Average cost            |            |                    | 201,785                       |                                                                                                                                                           |                                                                              |           |

**Table S8.** Fertigation system cost calculations

| Fertigation system component        | Price estimate (R) | Reference |
|-------------------------------------|--------------------|-----------|
| Nutrient control and pumping system | 257,440            | [117]     |
| Liquid nutrient reservoir tanks     | 71,280             | [118]     |
| <b>Total</b>                        | <b>328,720</b>     |           |

**Table S9.** Monitor and control cost calculations

|                        |                        | Scenarios with five levels | High-wire (TF) | Scenario (CC) with three levels |           |
|------------------------|------------------------|----------------------------|----------------|---------------------------------|-----------|
| Component              | Cost per component (R) |                            | Quantity       |                                 | Reference |
| Hydro-X-Pro            | 51,920                 | 7                          | 3              | 5                               | [119]     |
| MBS-PRO 4-in-1 sensor  | 5,910                  | 340                        | 136            | 204                             |           |
| Temperature controller | 1,604                  | 4                          | 4              | 4                               |           |
| Humidity controller    | 1,478                  | 4                          | 4              | 4                               |           |
| CO2 controller         | 995                    | 4                          | 4              | 4                               |           |
| Lighting controller    | 1,277                  | 85                         | 17             | 51                              |           |
| Total cost (R)         |                        | 2,497,801                  | 997,577        | 1,546,739                       |           |

## 5. Economic model OPEX intermediate data

This section provides all the supplementary information and calculations associated with the plant factory OPEX calculations of the developed economic model.

**Table S10.** Salary and position breakdowns

| Position                 | Quantity            | Minimum (R/h) | Average (R/h) | Maximum (R/h) | Hours per week (h/week) | Cultivation area per labourer (m <sup>2</sup> /labourer) | Reference    |
|--------------------------|---------------------|---------------|---------------|---------------|-------------------------|----------------------------------------------------------|--------------|
| Manager                  | 1                   | 182           | 249           | 308           | 40                      | -                                                        | [120]        |
| Arborist                 | 1                   | 79            | 103           | 124           | 40                      | -                                                        | [121]        |
| Cleaner                  | 1                   | 55            | 69            | 82            | 40                      | -                                                        | [122]        |
| Admin                    | 1                   | 116           | 161           | 197           | 40                      | -                                                        | [123]        |
| Marketing                | 1                   | 165           | 226           | 281           | 40                      | -                                                        | [124]        |
| Labourer (vertical farm) | 3<br>2 <sup>a</sup> | 18            | 49            | 56            | 20                      | 1250                                                     | [11,125,126] |
| Labourers (high-wire)    | 2                   | 18            | 49            | 56            | 20                      | 1700                                                     | [11,125,126] |

<sup>a</sup>Two labourers for scenario CC due to smaller growing area of 1632 m<sup>2</sup>.

**Table S11.** LED light system specifications and electricity use

|                                                                                 |           | Unit      | Value             | Reference             |           |           |
|---------------------------------------------------------------------------------|-----------|-----------|-------------------|-----------------------|-----------|-----------|
| LED lighting system specifications                                              |           |           |                   |                       |           |           |
| LED bar length                                                                  |           | m         | 1.1               | [127]                 |           |           |
| LED bar width                                                                   |           | m         | 0.045             |                       |           |           |
| Power per LED bar                                                               |           | W         | 63                |                       |           |           |
| Efficiency                                                                      |           | μmol/J    | 2.55              |                       |           |           |
| Photosynthetic Photon Flux (PPF)                                                |           | μmol/s    | 161               |                       |           |           |
| Photosynthetic Photon Flux Density (PPFD)<br>30cm from light source for 10 bars |           | μmol/m²/s | 900               |                       |           |           |
| Photosynthetic Photon Flux Density (PPFD)<br>30cm from single bar               |           | μmol/m²/s | 90                | Assumed               |           |           |
| LED energy consumption                                                          |           |           |                   |                       |           |           |
| Scenario specifications                                                         | Unit      | Lettuce   | Tomato<br>(dwarf) | Tomato<br>(high-wire) | Tobacco   | Cannabis  |
| PPFD required                                                                   | μmol/m²/s | 200       | 400               | 600                   | 275       | 500       |
| Light bars per grow area                                                        | bar/m²    | 3         | 5                 | 7                     | 4         | 6         |
| Total grow area                                                                 | m²        | 2720      | 2720              | 1020                  | 2720      | 1632      |
| Light bars required for grow<br>area                                            | -         | 8160      | 13600             | 7140                  | 10880     | 9792      |
| Photoperiod                                                                     | h         | 16        | 12                | 12                    | 13        | 16        |
| Annual operating days                                                           | days      | 335       | 335               | 335                   | 335       | 335       |
| Annual energy requirement                                                       | kWh       | 2,755,469 | 3,444,336         | 1,808,276             | 2,985,091 | 3,306,563 |

**Table S12.** Electricity pricing structure

|                                                  | Unit  | Minimum (off-peak)<br>pricing | Average | Maximum (standard)<br>pricing |
|--------------------------------------------------|-------|-------------------------------|---------|-------------------------------|
| Ancillary service charge                         | c/kWh | 0.61                          | -       | 0.61                          |
| Electrification and rural network subsidy charge | c/kWh | 13.37                         | -       | 13.37                         |
| Affordability subsidy charge                     | c/kWh | 6.54                          | -       | 6.54                          |
| Active energy charge                             | c/kWh | 74.99                         | -       | 123.72                        |
| Total                                            |       | 96                            | 120     | 144                           |

**Table S13.** HVAC calculations for plant factory scenarios

| Scenarios based on crop              |      |                                             |                                             |                                             |                                             |                                             |
|--------------------------------------|------|---------------------------------------------|---------------------------------------------|---------------------------------------------|---------------------------------------------|---------------------------------------------|
|                                      | Unit | Lettuce                                     | Tomato (dwarf)                              | Tomato (high-wire)                          | Tobacco                                     | Cannabis                                    |
| Heat generated from LED lights       | %    | 50                                          | 50                                          | 50                                          | 50                                          | 50                                          |
| Heat removed from LED lights         | kW   | 257                                         | 428                                         | 225                                         | 343                                         | 308                                         |
| Heat removed from evapotranspiration | kW   | 164 (min)<br>219 (average)<br>365 (maximum) | 189 (min)<br>315 (average)<br>483 (maximum) | 71 (min)<br>118 (average)<br>118 (maximum)  | 166 (min)<br>356 (average)<br>522 (maximum) | 206 (min)<br>253 (average)<br>301 (maximum) |
| Heat gained from the environment     | kW   | 0.36                                        | -0.30                                       | -0.30                                       | -0.90                                       | -0.72                                       |
| Heat removed from ventilation air    | kW   | 0.89                                        | -0.74                                       | -0.74                                       | -2.23                                       | -1.78                                       |
| Total heat removal from grow area    | kW   | 423 (min)<br>478 (average)<br>624 (maximum) | 616 (min)<br>742 (average)<br>910 (maximum) | 295 (min)<br>342 (average)<br>405 (maximum) | 506 (min)<br>696 (average)<br>862 (maximum) | 511 (min)<br>559 (average)<br>607 (maximum) |
| COP                                  | -    | 3                                           | 3                                           | 3                                           | 3                                           | 3                                           |
| Peak electricity required            | kW   | 141 (min)<br>159 (average)<br>208 (maximum) | 205 (min)<br>247 (average)<br>303 (maximum) | 98 (min)<br>114 (average)<br>135 (maximum)  | 169 (min)<br>232 (average)<br>287 (maximum) | 170 (min)<br>186 (average)<br>202 (maximum) |
| Annual electricity demand (minimum)  | kWh  | 903,357                                     | 1,077,587                                   | 488,453                                     | 934,345                                     | 1,095,129                                   |
| Annual electricity demand (average)  | kWh  | 1,050,274                                   | 1,415,141                                   | 615,036                                     | 1,443,179                                   | 1,223,638                                   |
| Annual electricity demand (maximum)  | kWh  | 1,442,054                                   | 1,865,213                                   | 783,813                                     | 1,888,410                                   | 1,352,148                                   |

**Table S14.** Water consumption and fertiliser data for plant factory scenarios

|                                                | Unit                 | Scenarios based on crop |                |                    |           |                   | Reference |
|------------------------------------------------|----------------------|-------------------------|----------------|--------------------|-----------|-------------------|-----------|
|                                                |                      | Lettuce                 | Tomato (dwarf) | Tomato (high-wire) | Tobacco   | Cannabis          |           |
| Mean daily percentage of annual daytime hours  | -                    | 0.30                    | 0.30           | 0.30               | 0.30      | 0.30              | -         |
| Mean daily temperature                         | °C                   | 17                      | 23             | 23                 | 28        | 26                | -         |
| Crop factor (minimum)                          | -                    | 0.45                    | 0.45           | 0.45               | 0.35      | 0.75 <sup>a</sup> | -         |
| Crop factor (average)                          | -                    | 0.6                     | 0.75           | 0.75               | 0.75      | 0.93 <sup>a</sup> | -         |
| Crop factor (maximum)                          | -                    | 1.00                    | 1.15           | 1.15               | 1.10      | 1.10 <sup>a</sup> | -         |
| Evapotranspiration rate (minimum)              | m/day                | 0.0021                  | 0.0025         | 0.0025             | 0.0022    | 0.0045            | -         |
| Evapotranspiration rate (average)              | m/day                | 0.0029                  | 0.0041         | 0.0041             | 0.0046    | 0.0055            | -         |
| Evapotranspiration rate (maximum)              | m/day                | 0.0048                  | 0.0063         | 0.0063             | 0.0068    | 0.0066            | -         |
| Evapotranspiration rate (minimum) <sup>b</sup> | m <sup>3</sup> /year | 1955                    | 2246           | 842                | 1975      | 2443              | -         |
| Evapotranspiration rate (average) <sup>b</sup> | m <sup>3</sup> /year | 2607                    | 3743           | 1404               | 4232      | 3013              | -         |
| Evapotranspiration rate (maximum) <sup>b</sup> | m <sup>3</sup> /year | 4345                    | 5740           | 2152               | 6207      | 3583              | -         |
| Water tariff                                   | R/m <sup>3</sup>     | 28.39                   | 28.39          | 28.39              | 28.39     | 28.39             | [128]     |
| Fertiliser cost                                | R/kg                 | 69.30                   | 69.30          | 69.30              | 69.30     | 69.30             | [129]     |
| Fertiliser concentration                       | kg/m <sup>3</sup>    | 1.11-1.85               | 1.11-1.85      | 1.11-1.85          | 1.11-1.85 | 1.11-1.85         | [129]     |

<sup>a</sup>Cannabis crop factor values assumed.<sup>b</sup>Evapotranspiration by per year was calculated using the evapotranspiration rate (m/day) and the grow areas of the plant factory scenarios.

**Table S15.** Grow media and seed demand for plant factory scenarios

|                              | Unit              | Value          | Reference |
|------------------------------|-------------------|----------------|-----------|
| <b>Grow media</b>            |                   |                |           |
| Rockwool slab price          | R/slab            | 63 - 94        | [130]     |
| Rockwool cube price          | R/cube            | 9 - 13         | [131]     |
| Rockwool plug price          | R/plug            | 2 - 3          | [132]     |
| Rockwool density             | kg/m <sup>3</sup> | 19.8           | [132]     |
| Brewers' spent grain price   | R/kg              | 3.70 – 4.50    | [133]     |
| Brewers' spent grain density | kg/m <sup>3</sup> | 450            | [134]     |
| <b>Crop seeds</b>            |                   |                |           |
| Tomato price                 | R/seed            | 0.24           | [135]     |
| Lettuce price                | R/seed            | 0.07           | [136]     |
| Tobacco price                | R/seed            | 1.20           | [137]     |
| Cannabis price               | R/seed            | 74.25 – 103.95 | [138]     |

**Table S16.** CO<sub>2</sub> supplement for plant factory scenarios

| Scenarios based on crop                      |                                          |               |                |                    |               |              |
|----------------------------------------------|------------------------------------------|---------------|----------------|--------------------|---------------|--------------|
|                                              | Unit                                     | Lettuce       | Tomato (dwarf) | Tomato (high-wire) | Tobacco       | Cannabis     |
| CO <sub>2</sub> uptake rate in grow area     | g/m <sup>2</sup> grow area/h photoperiod |               |                | 4-6                |               |              |
| CO <sub>2</sub> cost                         | R/kg                                     |               |                | 11                 |               |              |
| Desired CO <sub>2</sub> level by volume      | ppm                                      | 1000          | 1000           | 1000               | 750           | 950          |
| CO <sub>2</sub> flow rate for desired level  | m <sup>3</sup> /h                        | 0.54          | 0.54           | 0.54               | 0.32          | 0.495        |
| Density of CO <sub>2</sub> at 25°C           | kg/m <sup>3</sup>                        |               |                | 1.81               |               |              |
| CO <sub>2</sub> flow rate for desired levels | kg/h photoperiod                         | 0.98          | 0.98           | 0.98               | 0.57          | 0.90         |
| CO <sub>2</sub> uptake rate in grow area     | kg/h photoperiod                         | 10.88 – 16.32 | 10.88 – 16.32  | 4.08 – 6.12        | 10.88 – 16.32 | 6.53 – 9.80  |
| Total CO <sub>2</sub> flow rate              | kg/h photoperiod                         | 11.86 – 17.30 | 11.86 – 17.30  | 5.06 – 7.10        | 11.86 – 17.30 | 7.42 – 10.69 |
| Total CO <sub>2</sub> flow rate cost         | R/h photoperiod                          | 131 - 192     | 131 - 192      | 56 - 79            | 131 - 192     | 82 - 119     |

## 6. Plant factory economic analysis intermediate results

This section provides intermediate and supplementary data for the economic feasibility analysis.

**Table S17.** Plant factory dimension descriptions for each scenario

| Scenarios               |      |                    |         |           |       |       |       |       |       |
|-------------------------|------|--------------------|---------|-----------|-------|-------|-------|-------|-------|
|                         | Unit | TF                 | TM      | LF/LM/LRI | TC    | TPHB  | TT    | TTD   | CC    |
| Structure               |      |                    |         |           |       |       |       |       |       |
| Total footprint         | m²   | 1000               | 1000    | 1000      | 1000  | 1000  | 1000  | 1000  | 1000  |
| Grow chamber floor area | m²   | 600                | 600     | 600       | 600   | 600   | 600   | 600   | 600   |
| Structure height        | m    | 4                  | 4       | 4         | 4     | 4     | 4     | 4     | 4     |
| Grow chamber            |      |                    |         |           |       |       |       |       |       |
| Grow racks              | -    | 17<br>(rows)       | 17      | 17        | 17    | 17    | 17    | 17    | 17    |
| Grow levels per rack    | -    | High-wire<br>(3 m) | 5       | 5         | 5     | 5     | 5     | 5     | 3     |
| Grow rack length        | m    | 20 (row)           | 20      | 20        | 20    | 20    | 20    | 20    | 20    |
| Grow rack width         | m    | 1.78 (row)         | 1.78    | 1.78      | 1.78  | 1.78  | 1.78  | 1.78  | 1.78  |
| Grow area per level     | m²   | -                  | 32      | 32        | 32    | 32    | 32    | 32    | 32    |
| Grow area per rack      | m²   | -                  | 160     | 160       | 160   | 160   | 160   | 160   | 96    |
| Total grow area         | m²   | 1020               | 2720    | 2720      | 2720  | 2720  | 2720  | 2720  | 1632  |
| Crop data               |      |                    |         |           |       |       |       |       |       |
| Plant heights           | cm   | <300               | 20 - 40 | 15 - 30   | <100  | <100  | <60   | <25   | <140  |
| Plant height references | -    | [139]              | [140]   | [141]     | [142] | [143] | [144] | [144] | [145] |

**Table S18.** Miraculin cost estimates based on miracle berry prices and sucrose equivalency

|                                                            | Unit        | Value                    | Reference |
|------------------------------------------------------------|-------------|--------------------------|-----------|
| <b>Miracle berry equivalent pricing</b>                    |             |                          |           |
| Miracle berry fresh weight                                 | g/berry     | 1                        | [146]     |
| Miraculin content in miracle berry                         | µg/g        | 400                      | [146]     |
| Miraculin content in miracle berry                         | µg/fruit    | 400                      | -         |
| Miracle berry price                                        | R/g         | 29.70                    | [147,148] |
| Miraculin price                                            | R/ µg       | 0.074                    | -         |
| <b>Miraculin price</b>                                     | <b>R/kg</b> | <b>74,250,00 ± 20%</b>   | -         |
| <b>Sucrose equivalent pricing</b>                          |             |                          |           |
| Miraculin molecular weight                                 | g/mol       | 24,600                   | [149]     |
| Sucrose molecular weight                                   | g/mol       | 342                      | [150]     |
| Miraculin:Sucrose molecular ratio for equivalent sweetness | -           | 4x10 <sup>-7</sup> :0.4  | [149]     |
| Miraculin:Sucrose mass ratio for equivalent sweetness      | -           | 1:13902                  | -         |
| Sucrose (sugar) price                                      | R/kg        | 20 - 28                  | [151,152] |
| <b>Miraculin price of 1 kg based on 13,902 kg sucrose</b>  | <b>R/kg</b> | <b>278,049 – 389,268</b> | -         |

The sensitivity analysis of the COGS value for TF is shown in Figure S1 and shows that the COGS was most sensitive to electricity tariff changes, HVAC energy demand and fertiliser requirements. The electricity required for LED lighting was not presented as a value range and was calculated as a fixed value for each of the investigated scenarios. The impact of LED electricity requirements was reflected in the electricity tariff variable as the tariff rate applied to electricity demands for lighting, HVAC and ancillary equipment. A breakdown of the electricity demand for lighting and HVAC is shown in Table S11 to Table S13.

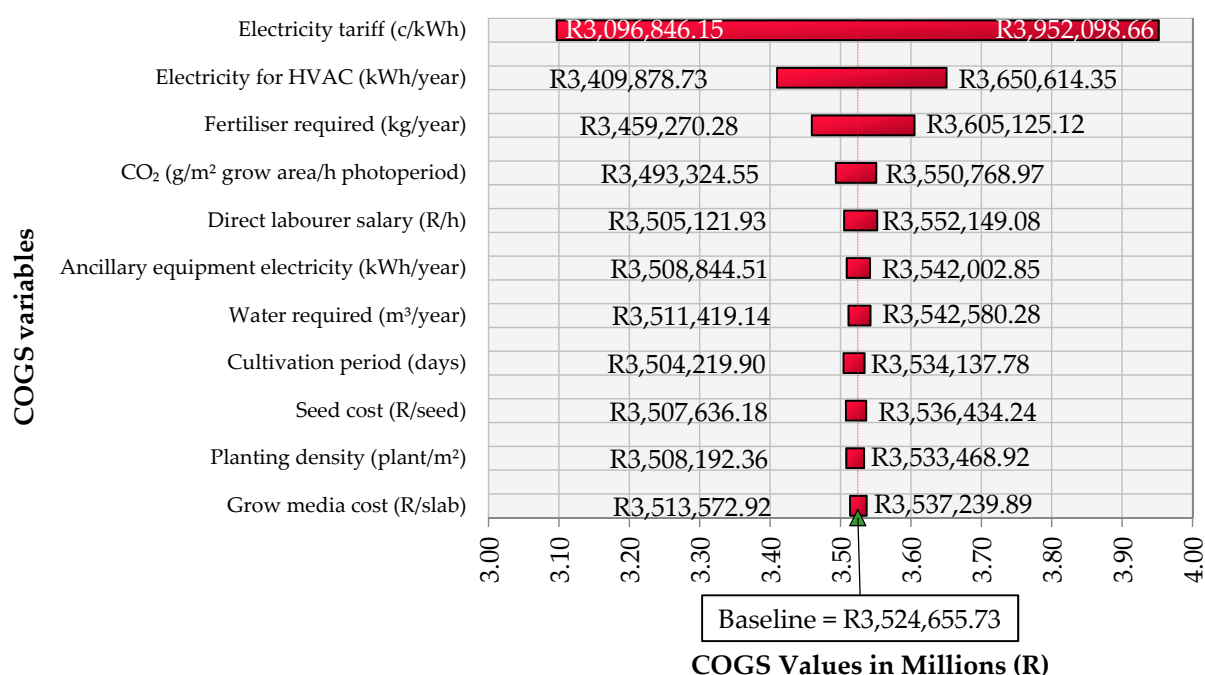**Figure S1.** The sensitivity of cost of goods sold (COGS) values for the tomato-food (TF) plant factory scenario.

The elevated COGS values for TM were attributed to the larger growing area and higher planting densities. This resulted in more plants being cultivated each year and led to elevated variable costs and was reflected in Figure S2. Electricity usage was especially impacted as additional lighting was required to cover the entire growing area of the vertically stacked grow racks in TM.

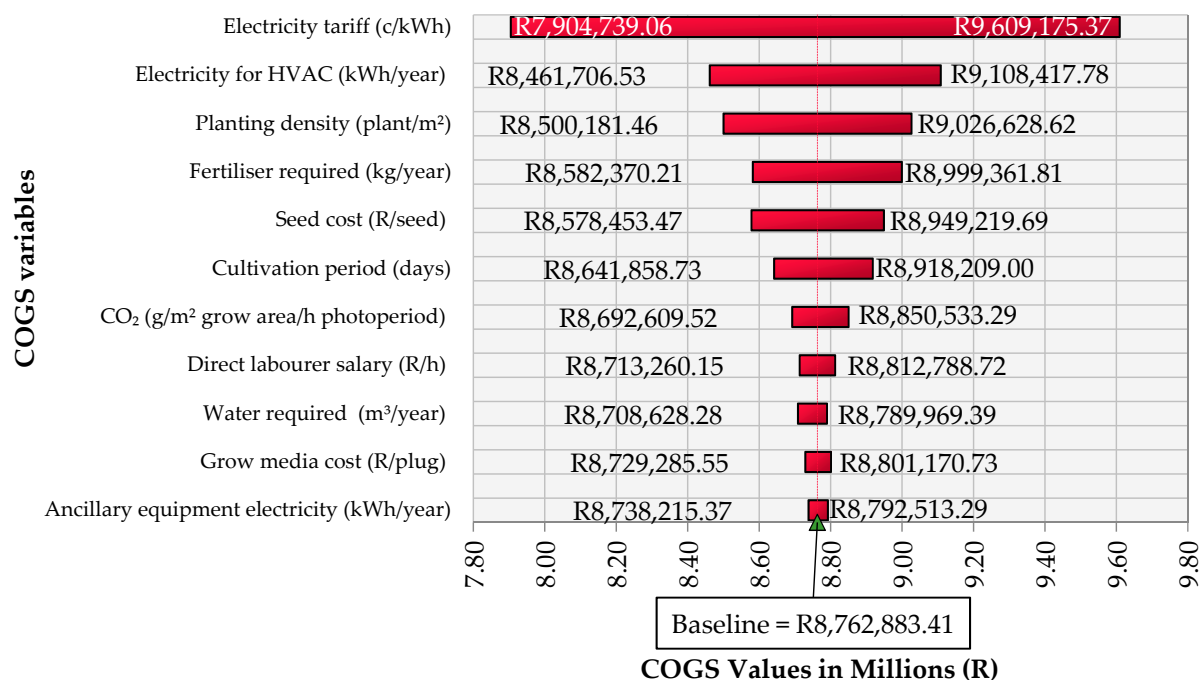

**Figure S2.** The sensitivity of cost of goods sold (COGS) values for the tomato–miraculin (TM) plant factory scenario.

The sensitivity analysis of COGS values for the baseline LF scenario, Figure S3, shows that electricity, fertiliser and grow media costs were among the biggest cost drivers. Based on these results, it was decided to use the LRI scenario to investigate energy cost reductions by using PV panels [23] for renewable energy generation. The integration of a plant factory with a beer brewing plant allowed for the valorisation of brewers' spent grains [10,153] into grow media and wastewater into liquid fertiliser for hydroponic cultivation [154]. The integration component of LRI only considered cost reduction by using brewers' spent grains for grow media as the cost of using anaerobically digested brewery wastewater was unknown.

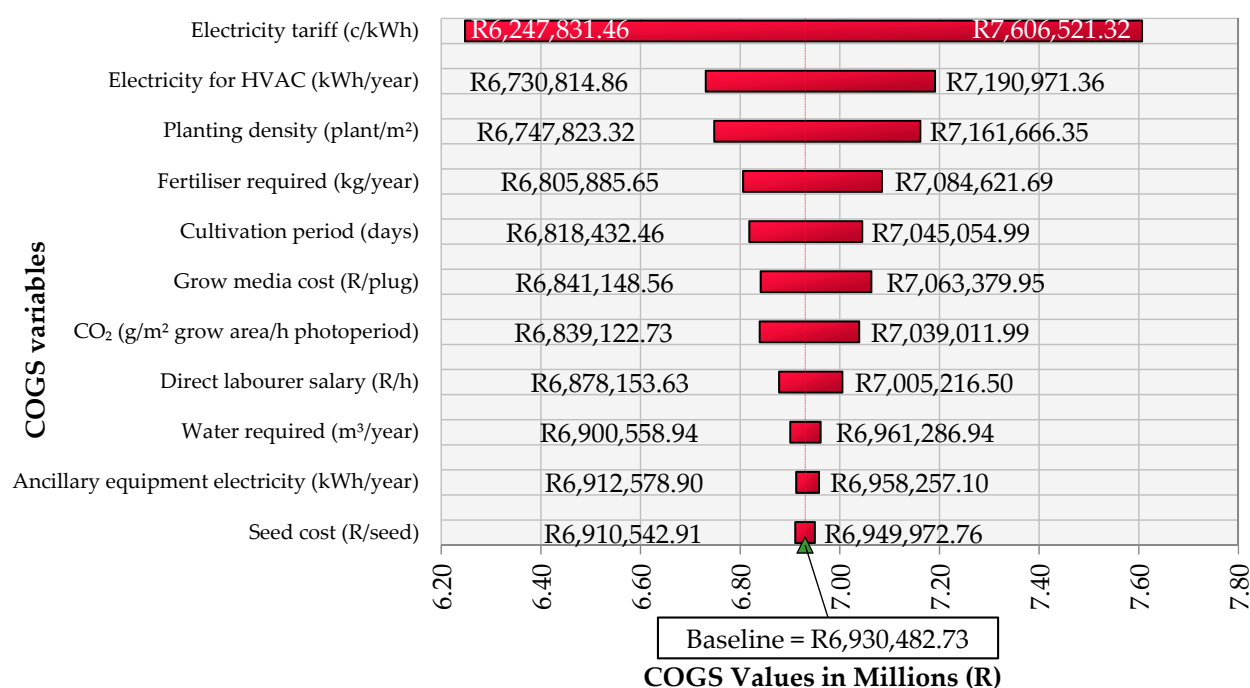

**Figure S3.** The sensitivity of cost of goods sold (COGS) values for the lettuce–food (LF) plant factory scenario.

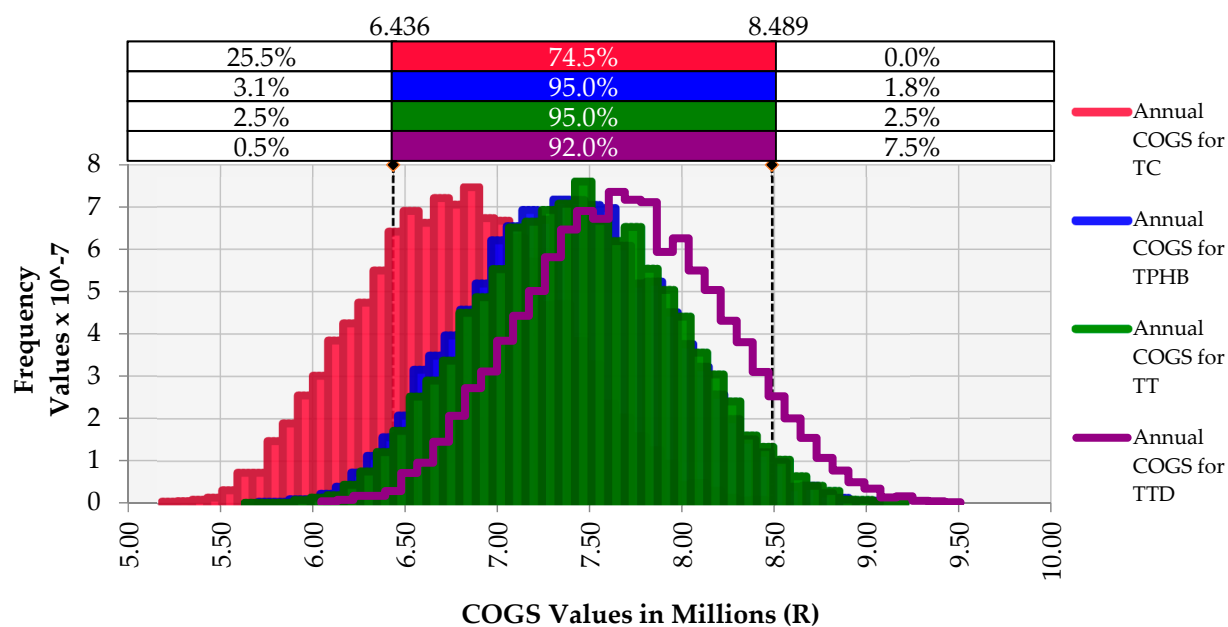

**Figure S4.** Probability density distributions of the cost of goods sold (COGS) for the tobacco–conventional (TC), tobacco–PHB (TPHB), tobacco–transgenic (TT) and tobacco–transgenic-dwarf (TTD) plant factory scenarios.

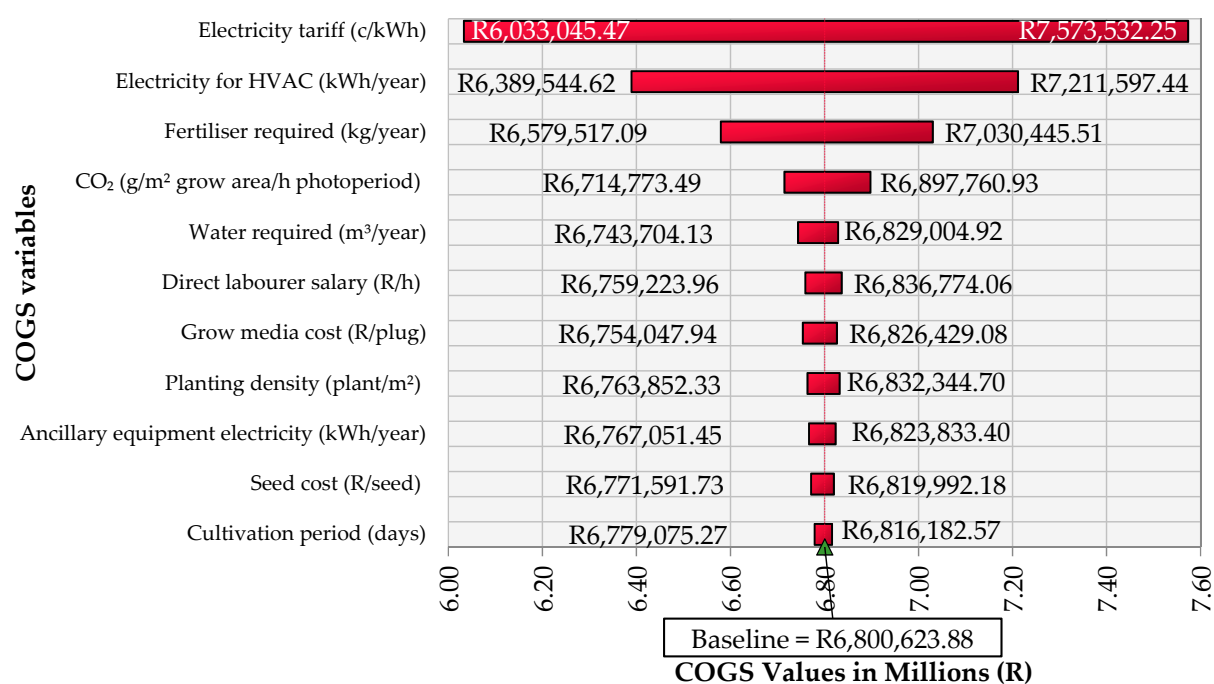

Figure S5. The sensitivity of cost of goods sold (COGS) values for the tobacco-conventional (TC) plant factory scenario.

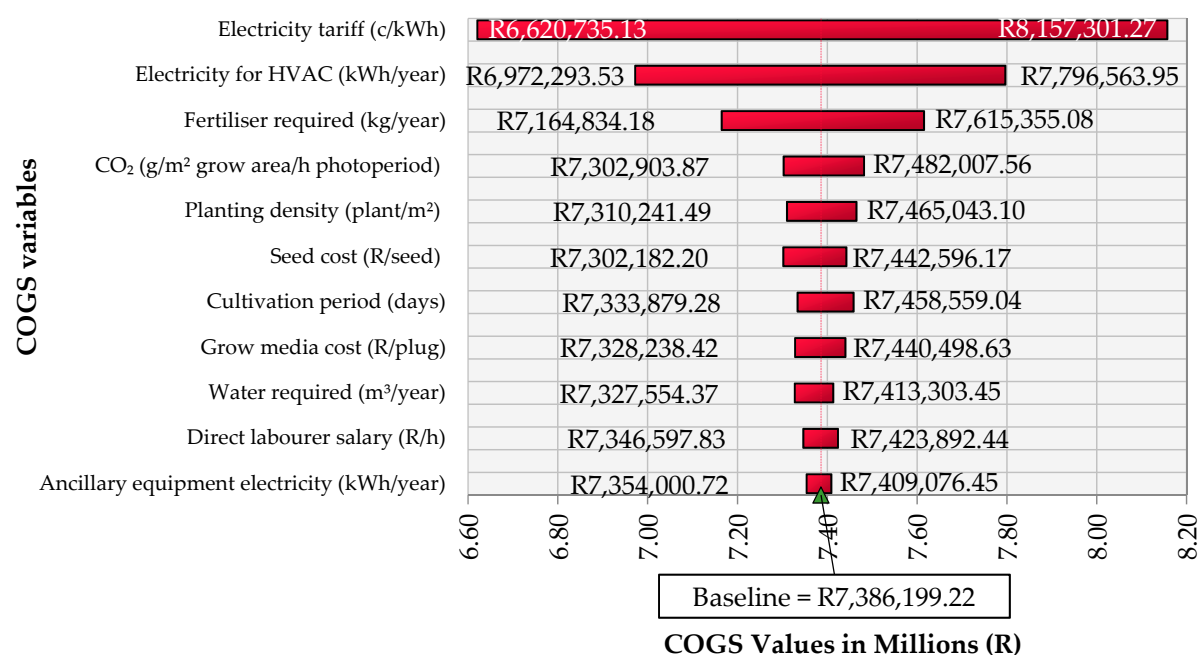

Figure S6. The sensitivity of cost of goods sold (COGS) values for the tobacco-PHB (TPHB) plant factory scenario.

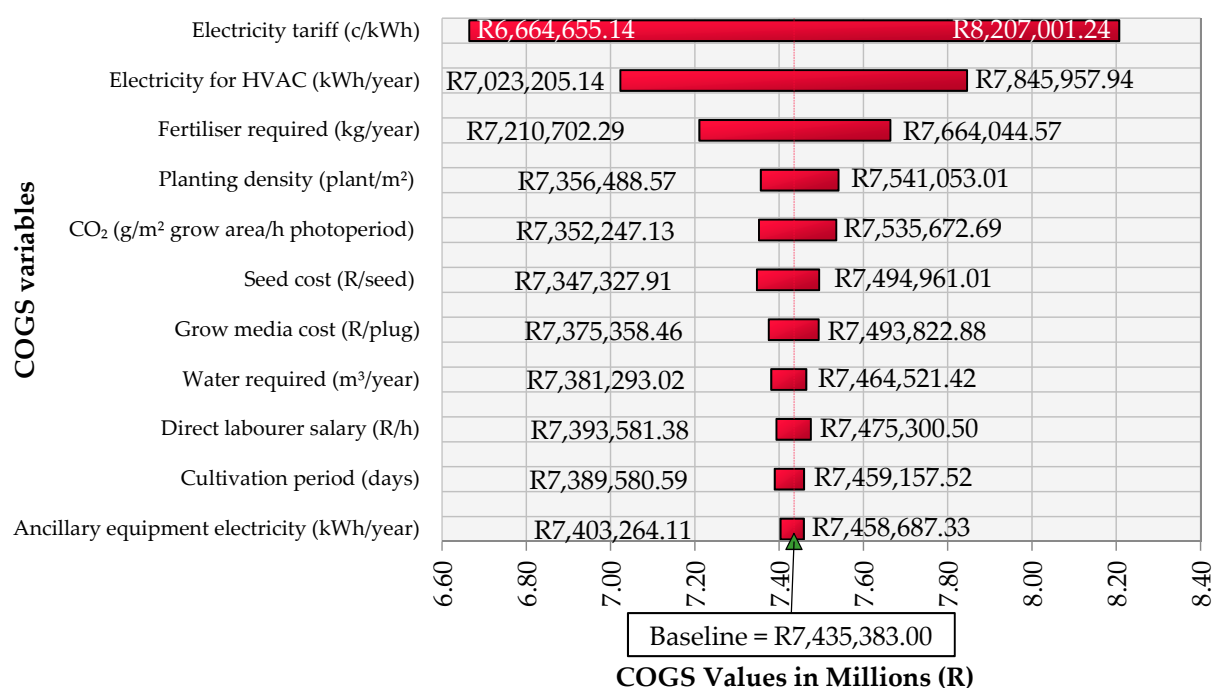

**Figure S7.** The sensitivity of cost of goods sold (COGS) values for the tobacco-transgenic (TT) plant factory scenario.

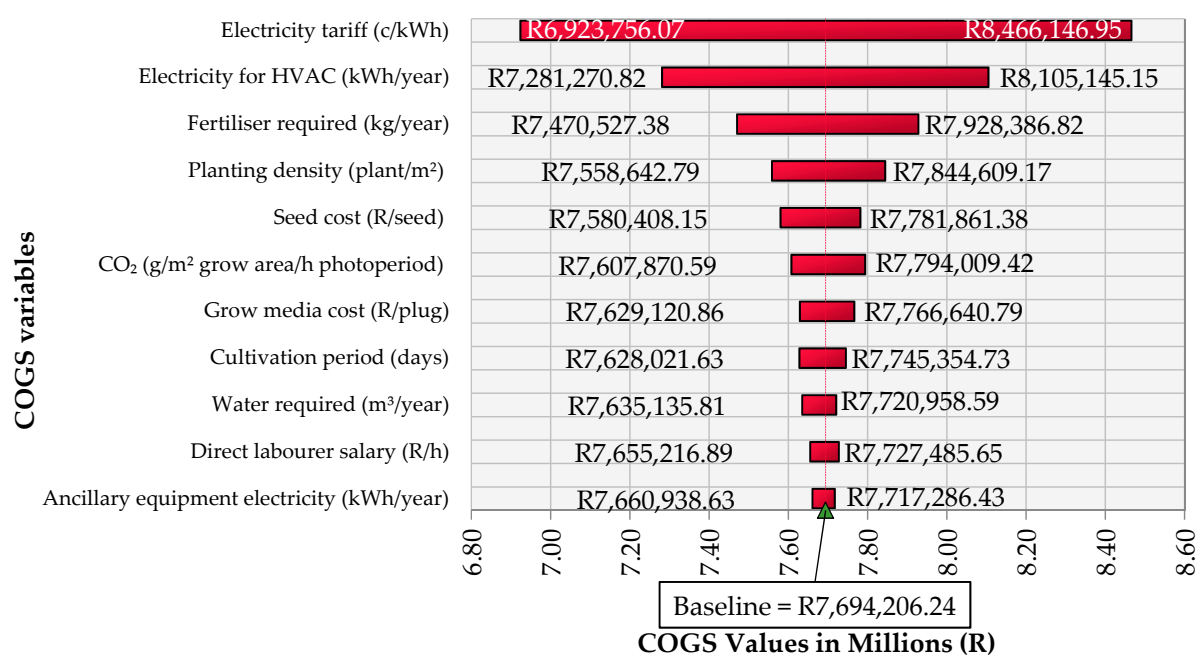

**Figure S8.** The sensitivity of cost of goods sold (COGS) values for the tobacco-transgenic-dwarf (TTD) plant factory scenario.

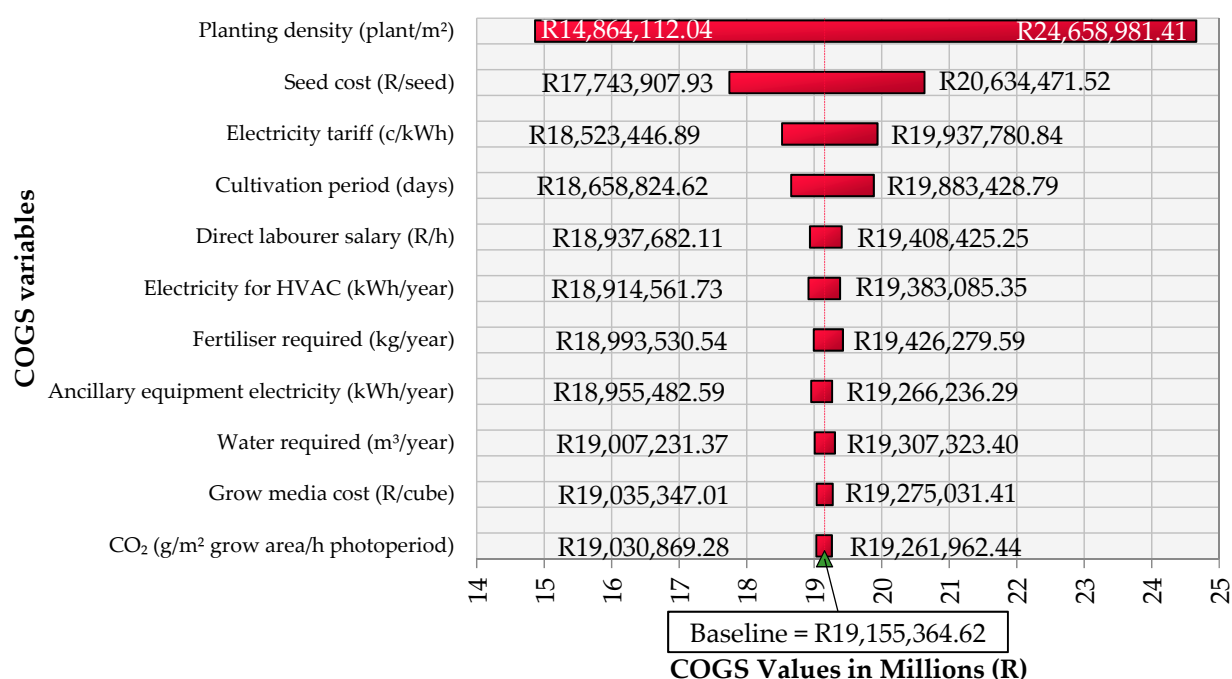

**Figure S9.** The sensitivity of cost of goods sold (COGS) values for the cannabis-conventional (CC) plant factory scenario.

## 7. Plant factory economic analysis market values and yield results

The primary product yields and associated market prices for TF and TM are shown in Table S19. Yields were obtained from the simulated scenarios and market prices were obtained from literature. The revenue from selling edible tomatoes in TF was evaluated using open-field producer prices and hydroponic selling prices to show the need of asking a premium for biomass that was cultivated in plant factories.

**Table S19.** Tomato-based plant factory yields and market values

| Scenario | Description                                     | Unit                               | Values                  | References |
|----------|-------------------------------------------------|------------------------------------|-------------------------|------------|
| TF       | Tomato fresh weight                             | kg/year                            | 110,883 – 159,864       | -          |
| TF       | Tomato producer price                           | R/kg                               | 7.76 – 11.64            | [155,156]  |
| TF       | Tomato hydroponic price                         | R/kg                               | 27.00 – 82.00           | [157–159]  |
| TM       | Tomato fresh weight                             | kg/year                            | 63,017 – 108,351        | -          |
| TM       | Miraculin accumulation in transgenic tomatoes   | g miraculin/kg tomato fresh weight | 0.617 – 0.978           | [160]      |
| TM       | Miraculin from miracle berry price <sup>a</sup> | R/kg miraculin                     | 59,400,000 – 89,100,000 | [147,148]  |
| TM       | Miraculin sugar equivalent price <sup>b</sup>   | R/kg miraculin                     | 290,481 – 376,830       | [149]      |

<sup>a</sup>Miraculin value was determined based on miracle berry market value [147,148] and assuming that miracle berry value was related to the miraculin accumulation levels [160] found in literature.

<sup>b</sup>Miraculin price based on sugar market value and miraculin:sucrose weight ratios to induce the same sweetening effect.

The lettuce yields and market selling prices for edible lettuce and accumulated miraculin are shown in Table S20. All the lettuce scenarios used the same plant factory grow area and had the same lettuce yields.

**Table S20.** Lettuce-based plant factory yields and market values

| Scenario  | Description                                   | Unit                               | Values            | References |
|-----------|-----------------------------------------------|------------------------------------|-------------------|------------|
| LF/LM/LRI | Lettuce fresh weight                          | kg/year                            | 96,294 - 249,464  | -          |
| LF        | Lettuce producer price                        | R/kg                               | 6.24 – 9.36       | [156]      |
| LF        | Lettuce hydroponic price                      | R/kg                               | 100-130           | [161,162]  |
| LM        | Miraculin accumulation in transgenic lettuce  | g miraculin/kg tomato fresh weight | 0.03 – 0.04       | [163]      |
| LM        | Miraculin sugar equivalent price <sup>a</sup> | R/kg miraculin                     | 290,481 – 376,830 | [149]      |

<sup>a</sup>Miraculin price based on sugar market value and miraculin:sucrose weight ratios to induce the same sweetening effect.

The biomass yields, value-added product yields and market prices for the products of each tobacco scenario are shown in Table S21. This data was used to calculate the revenue results of the tobacco scenarios. Tobacco fresh weight and methane were considered as two primary products of TC. Revenue derived from biodiesel production was considered a supplementary revenue stream as it was produced from tobacco seeds which is typically not harvested [164]. Extractable artemisinin was also considered supplementary as it has been investigated as a value-added product to help lowering the cost of biofuel production [93].

**Table S21.** Tobacco-based plant factory yields and market values

| Scenario | Description                                                 | Unit                                  | Values                                        | References |
|----------|-------------------------------------------------------------|---------------------------------------|-----------------------------------------------|------------|
| TC       | Tobacco fresh weight                                        | kg/year                               | 49,863- 63,485                                | -          |
| TC       | Tobacco producer price                                      | R/kg                                  | 41.39 - 56.61                                 | [156]      |
| TC       | Biodiesel yield <sup>a</sup>                                | kg/year                               | 507 - 645                                     | [164,165]  |
| TC       | Biodiesel price                                             | R/kg                                  | 7.87 – 10.88                                  | [166]      |
| TC       | Methane yield <sup>b</sup>                                  | m <sup>3</sup> /year                  | 5,734 - 9,122                                 | [165,167]  |
| TC       | Methane price                                               | R/m <sup>3</sup>                      | 3.09 – 4.34                                   | [166]      |
| TC       | Artemisinin accumulation in transgenic tobacco <sup>c</sup> | g artemisinin/kg tobacco fresh weight | 0.144 – 0.154                                 | [168]      |
| TC       | Artemisinin price                                           | R/kg                                  | 3,164 - 14,244                                | [93]       |
| TPHB     | Tobacco fresh weight                                        | kg/year                               | 23,235 - 35,786                               | -          |
| TPHB     | PHB accumulation in transgenic tobacco <sup>d</sup>         | kg PHB/kg fresh weight tobacco        | ~0.03                                         | [143]      |
| TPHB     | PHB price (polypropylene equivalent)                        | R/kg                                  | 16.67 – 18.97                                 | [169]      |
| TPHB     | PHB price (PHB specific)                                    | R/kg                                  | 62.71 – 85.78                                 | [170]      |
| TT       | Tobacco fresh leaf weight <sup>e</sup>                      | kg/year                               | 10,626 - 16,171                               | -          |
| TT/TTD   | HBV antibody accumulation levels in transgenic tobacco      | kg HBV/kg fresh weight tobacco leaves | 2.73x10 <sup>-7</sup> – 4.25x10 <sup>-7</sup> | [144]      |
| TT/TTD   | HBV antibody price                                          | R/mg                                  | 6,907 – 8,639                                 | [171,172]  |
| TTD      | Tobacco fresh leaf weight <sup>e</sup>                      | kg/year                               | 11,709 - 16,943                               | -          |

<sup>a</sup>Biodiesel yield based on tobacco seed content 3 wt% of total fresh weight [165] and 2.95:1 seed to biodiesel conversion ratio on mass basis [164].

<sup>b</sup>Methane based on 101-169 m<sup>3</sup>/ton feedstock conversion ratio [165,167].

<sup>c</sup>Artemisinin accumulation based on reported yields in dry weight tobacco [168] and an assumed 75% moisture content of fresh weight tobacco.

<sup>d</sup>PHB accumulation based on reported yields in dry weight tobacco [143] and an assumed 75% moisture content of fresh weight tobacco.

<sup>e</sup>Only leaf weight considered as the transgenic tobacco plants were small and HBV antibody accumulation was considered in the leaves only.

The cannabis biomass yields and market values for CC are shown in Table S22. The primary products were assumed to be the leaves and inflorescences of the whole plant and all further economic analyses were formed with the tabulated leaves and inflorescences biomass yields.

**Table S22.** Cannabis-based plant factory yields and market values

| Scenario | Description                                                  | Unit    | Values          | References |
|----------|--------------------------------------------------------------|---------|-----------------|------------|
| CC       | Cannabis whole plant fresh weight                            | kg/year | 13,104 - 55,238 | -          |
| CC       | Cannabis leaves and inflorescences fresh weight <sup>a</sup> | kg/year | 3,931 - 16,571  | [173]      |
| CC       | Cannabis fresh weight price <sup>b</sup>                     | R/kg    | 10,469 – 15,919 | [174,175]  |

<sup>a</sup>Leaves and inflorescences yield assumed as 30% of whole plant fresh weight yield.

<sup>b</sup>Based on reported dry weight prices and an assumed moisture content of 75%. Reported dry weight prices assumed to include only leaves and inflorescences.

## 8. Plant factory economic analysis supplementary results

This section provides results from the economic feasibility evaluation of the investigated plant factory scenarios which was not included in the main body of research.

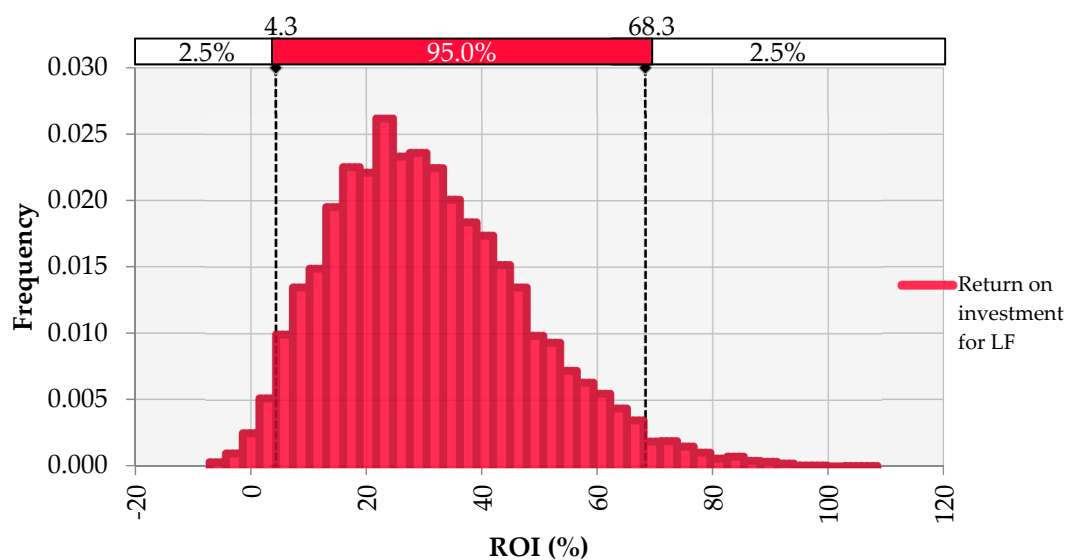

**Figure S10.** Probability density distribution of the return on investment (ROI) for lettuce–food (LF) scenario based on hydroponic pricing.

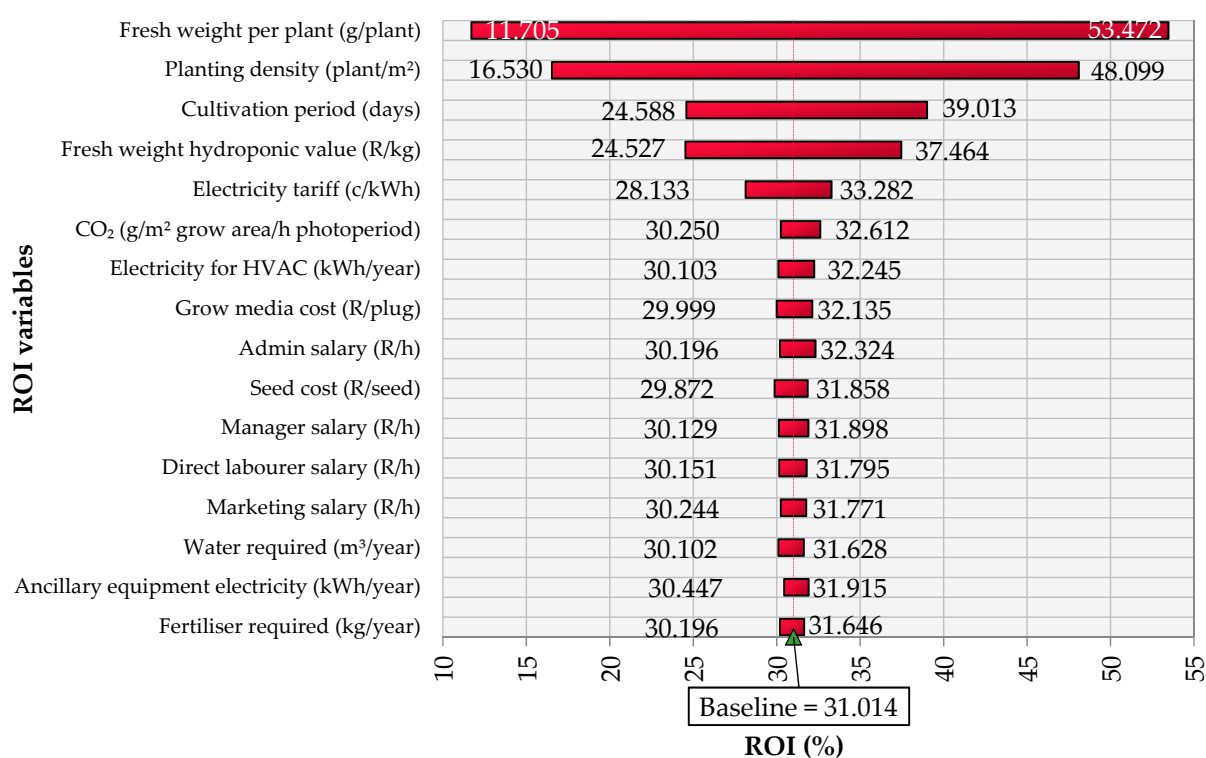

**Figure S11.** The sensitivity of return on investment (ROI) for the lettuce–food (LF) plant factory scenario.

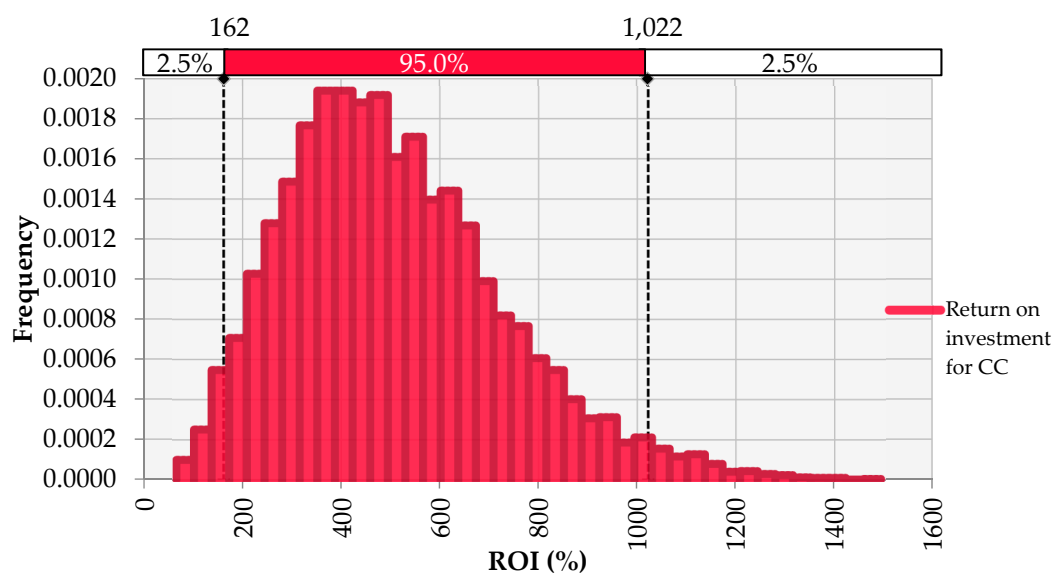

**Figure S12.** Probability density distribution of the return on investment (ROI) for cannabis–conventional (CC) scenario based on hydroponic pricing.

## References

1. Gruda, N.; Bisbis, M.; Tanny, J. Influence of Climate Change on Protected Cultivation: Impacts and Sustainable Adaptation Strategies - A Review. *J. Clean. Prod.* **2019**, *225*, 481–495, doi:10.1016/j.jclepro.2019.03.210.
2. Khoshnevisan, B.; Shariati, H.M.; Rafiee, S.; Mousazadeh, H. Comparison of Energy Consumption and GHG Emissions of Open Field and Greenhouse Strawberry Production. *Renew. Sustain. Energy Rev.* **2014**, *29*, 316–324, doi:10.1016/j.rser.2013.08.098.
3. Kuswardhani, N.; Soni, P.; Shivakoti, G.P. Comparative Energy Input–Output and Financial Analyses of Greenhouse and Open Field Vegetables Production in West Java, Indonesia. *Energy* **2013**, *53*, 83–92, doi:10.1016/j.energy.2013.02.032.
4. Song, X.P.; Tan, H.T.W.; Tan, P.Y. Assessment of Light Adequacy for Vertical Farming in a Tropical City. *Urban For. Urban Green.* **2018**, *29*, 49–57, doi:10.1016/j.ufug.2017.11.004.
5. Kozai, T. *Smart Plant Factory*; Kozai, T., Ed.; Springer Singapore: Singapore, 2018; ISBN 978-981-13-1064-5.
6. Shamshiri, R.R.; Kalantari, F.; Ting, K.C.; Thorp, K.R.; Hameed, I.A.; Weltzien, C.; Ahmad, D.; Mojgan Shad, Z. Advances in Greenhouse Automation and Controlled Environment Agriculture: A Transition to Plant Factories and Urban Agriculture. *Int. J. Agric. Biol. Eng.* **2018**, *11*, 1–22, doi:10.25165/j.ijabe.20181101.3210.
7. Kozai, T.; Kubota, C.; Takagaki, M.; Maruo, T. Greenhouse Environment Control Technologies for Improving the Sustainability of Food Production. *Acta Hortic.* **2015**, *1107*, 1–14, doi:10.17660/ActaHortic.2015.1107.1.
8. Moon, K.-B.; Park, J.-S.; Park, Y.-I.; Song, I.-J.; Lee, H.-J.; Cho, H.S.; Jeon, J.-H.; Kim, H.-S. Development of Systems for the Production of Plant-Derived Biopharmaceuticals. *Plants* **2019**, *9*, 30, doi:10.3390/plants9010030.
9. Hu, M.-C.; Chen, Y.-H.; Huang, L.-C. A Sustainable Vegetable Supply Chain Using Plant Factories in Taiwanese Markets: A Nash–Cournot Model. *Int. J. Prod. Econ.* **2014**, *152*, 49–56, doi:10.1016/j.ijpe.2014.01.026.
10. Li, L.; Li, X.; Chong, C.; Wang, C.-H.; Wang, X. A Decision Support Framework for the Design and Operation of Sustainable Urban Farming Systems. *J. Clean. Prod.* **2020**, *268*, 121928, doi:10.1016/j.jclepro.2020.121928.
11. Zeidler, C.; Schubert, D.; Vrakking, V. Vertical Farm 2.0: Designing an Economically Feasible Vertical Farm-A Combined European Endeavor for Sustainable Urban Agriculture Available online: <https://www.researchgate.net/publication/321427717> (accessed on 11 October 2020).
12. Kim, B.-H.; Cho, J.-H. A Study on Modular Smart Plant Factory Using Morphological Image Processing. *Electronics* **2020**, *9*, 1661, doi:10.3390/electronics9101661.
13. Thomas, B.M.; Awadh, D.G. Light Quality and Photoperiod Influence Crop Growth, Productivity and Produce Quality in Hydroponic Vegetable Production. *Acta Hortic.* **2020**, *1273*, 271–280, doi:10.17660/ActaHortic.2020.1273.36.
14. Bartzas, G.; Zaharaki, D.; Komnitsas, K. Life Cycle Assessment of Open Field and Greenhouse Cultivation of Lettuce and Barley. *Inf. Process. Agric.* **2015**, *2*, 191–207, doi:10.1016/j.inpa.2015.10.001.
15. Muller, A.; Ferré, M.; Engel, S.; Gattinger, A.; Holzkämper, A.; Huber, R.; Müller, M.; Six, J. Can Soil-Less Crop Production Be a Sustainable Option for Soil Conservation and Future Agriculture? *Land use policy* **2017**, *69*, 102–105, doi:10.1016/j.landusepol.2017.09.014.
16. Gul, A.; Sen, F.; Bonakdarzede, M. Does Greenhouse Covering Material Affect Fruit Quality of Hydroponic Tomatoes? *Acta Hortic.* **2015**, *1107*, 237–244, doi:10.17660/ActaHortic.2015.1107.32.
17. Harris, Z.M.; Spake, R.; Taylor, G. Land Use Change to Bioenergy: A Meta-Analysis of Soil Carbon and GHG Emissions. *Biomass and Bioenergy* **2015**, *82*, 27–39, doi:10.1016/j.biombioe.2015.05.008.
18. Harris, Z.M.; Alberti, G.; Viger, M.; Jenkins, J.R.; Rowe, R.; McNamara, N.P.; Taylor, G. Land-Use Change to Bioenergy: Grassland to Short Rotation Coppice Willow Has an Improved Carbon Balance. *GCB Bioenergy* **2017**,

- 9, 469–484, doi:10.1111/gcbb.12347.
19. Vanhoudt, D.; Desmedt, J.; Van Bael, J.; Robeyn, N.; Hoes, H. An Aquifer Thermal Storage System in a Belgian Hospital: Long-Term Experimental Evaluation of Energy and Cost Savings. *Energy Build.* **2011**, *43*, 3657–3665, doi:10.1016/j.enbuild.2011.09.040.
20. Nußholz, J.L.K.; Rasmussen, F.N.; Milios, L. Circular Building Materials: Carbon Saving Potential and the Role of Business Model Innovation and Public Policy. *Resour. Conserv. Recycl.* **2019**, *141*, 308–316, doi:10.1016/j.resconrec.2018.10.036.
21. Han, H.; Tai Kim, J. Application of High-Density Daylight for Indoor Illumination. *Energy* **2010**, *35*, 2654–2666, doi:10.1016/j.energy.2009.05.037.
22. Oh, S.J.; Chun, W.; Riffat, S.B.; Jeon, Y. II; Dutton, S.; Han, H.J. Computational Analysis on the Enhancement of Daylight Penetration into Dimly Lit Spaces: Light Tube vs. Fiber Optic Dish Concentrator. *Build. Environ.* **2013**, *59*, 261–274, doi:10.1016/j.buildenv.2012.08.025.
23. Anctil, A.; Lee, E.; Lunt, R.R. Net Energy and Cost Benefit of Transparent Organic Solar Cells in Building-Integrated Applications. *Appl. Energy* **2020**, *261*, 114429, doi:10.1016/j.apenergy.2019.114429.
24. Vu, N.H.; Shin, S. Cost-Effective Optical Fiber Daylighting System Using Modified Compound Parabolic Concentrators. *Sol. Energy* **2016**, *136*, 145–152, doi:10.1016/j.solener.2016.06.064.
25. Ghisi, E.; Tinker, J.A. Evaluating the Potential for Energy Savings on Lighting by Integrating Fibre Optics in Buildings. *Build. Environ.* **2006**, *41*, 1611–1621, doi:10.1016/j.buildenv.2005.06.013.
26. Arnaoutakis, G.E.; Marques-Hueso, J.; Mallick, T.K.; Richards, B.S. Coupling of Sunlight into Optical Fibres and Spectral Dependence for Solar Energy Applications. *Sol. Energy* **2013**, *93*, 235–243, doi:10.1016/j.solener.2013.04.008.
27. Cecconet, D.; Raček, J.; Callegari, A.; Hlavínek, P. Energy Recovery from Wastewater: A Study on Heating and Cooling of a Multipurpose Building with Sewage-Reclaimed Heat Energy. *Sustainability* **2019**, *12*, 116, doi:10.3390/su12010116.
28. Brückner, S.; Liu, S.; Miró, L.; Radspieler, M.; Cabeza, L.F.; Lävemann, E. Industrial Waste Heat Recovery Technologies: An Economic Analysis of Heat Transformation Technologies. *Appl. Energy* **2015**, *151*, 157–167, doi:10.1016/j.apenergy.2015.01.147.
29. Zhang, Q.; Sun, Y.; Xu, W.; Zhu, D. Organic Thermoelectric Materials: Emerging Green Energy Materials Converting Heat to Electricity Directly and Efficiently. *Adv. Mater.* **2014**, *26*, 6829–6851, doi:10.1002/adma.201305371.
30. Vélez, F.; Segovia, J.J.; Martín, M.C.; Antolín, G.; Chejne, F.; Quijano, A. A Technical, Economical and Market Review of Organic Rankine Cycles for the Conversion of Low-Grade Heat for Power Generation. *Renew. Sustain. Energy Rev.* **2012**, *16*, 4175–4189, doi:10.1016/j.rser.2012.03.022.
31. Allardyce, C.S.; Fankhauser, C.; Zakeeruddin, S.M.; Grätzel, M.; Dyson, P.J. The Influence of Greenhouse-Integrated Photovoltaics on Crop Production. *Sol. Energy* **2017**, *155*, 517–522, doi:10.1016/j.solener.2017.06.044.
32. Fischmann, T. Method and System for the Sustainable Cooling of Industrial Processes 2013.
33. Fleuchaus, P.; Godschalk, B.; Stober, I.; Blum, P. Worldwide Application of Aquifer Thermal Energy Storage – A Review. *Renew. Sustain. Energy Rev.* **2018**, *94*, 861–876, doi:10.1016/j.rser.2018.06.057.
34. Milani, D.; Qadir, A.; Vassallo, A.; Chiesa, M.; Abbas, A. Experimentally Validated Model for Atmospheric Water Generation Using a Solar Assisted Desiccant Dehumidification System. *Energy Build.* **2014**, *77*, 236–246, doi:10.1016/j.enbuild.2014.03.041.
35. Chen, P.; Zhu, G.; Kim, H.-J.; Brown, P.B.; Huang, J.-Y. Comparative Life Cycle Assessment of Aquaponics and

- Hydroponics in the Midwestern United States. *J. Clean. Prod.* **2020**, *275*, 122888, doi:10.1016/j.jclepro.2020.122888.
36. Kalantari, F.; Tahir, O.M.; Joni, R.A.; Fatemi, E. Opportunities and Challenges in Sustainability of Vertical Farming: A Review. *J. Landsc. Ecol.* **2018**, *11*, 35–60, doi:10.1515/jlecol-2017-0016.
  37. Iddio, E.; Wang, L.; Thomas, Y.; McMorrow, G.; Denzer, A. Energy Efficient Operation and Modeling for Greenhouses: A Literature Review. *Renew. Sustain. Energy Rev.* **2020**, *117*, 109480, doi:10.1016/j.rser.2019.109480.
  38. Goto, E. Plant Production in a Closed Plant Factory with Artificial Lighting. *Acta Hort.* **2012**, *956*, 37–49, doi:10.17660/ActaHortic.2012.956.2.
  39. Yanes, A.R.; Martinez, P.; Ahmad, R. Towards Automated Aquaponics: A Review on Monitoring, IoT, and Smart Systems. *J. Clean. Prod.* **2020**, *263*, 121571, doi:10.1016/j.jclepro.2020.121571.
  40. Kwon, S.-Y.; Ryu, S.-H.; Lim, J.-H. Design and Implementation of an Integrated Management System in a Plant Factory to Save Energy. *Cluster Comput.* **2014**, *17*, 727–740, doi:10.1007/s10586-013-0295-2.
  41. Ozkan, B.; Fert, C.; Karadeniz, C.F. Energy and Cost Analysis for Greenhouse and Open-Field Grape Production. *Energy* **2007**, *32*, 1500–1504, doi:10.1016/j.energy.2006.09.010.
  42. Niu, G.; Masabni, J. Plant Production in Controlled Environments. *Horticulturae* **2018**, *4*, 28, doi:10.3390/horticulturae4040028.
  43. Azad, M.O.K.; Kjaer, K.H.; Adnan, M.; Naznin, M.T.; Lim, J.D.; Sung, I.J.; Park, C.H.; Lim, Y.S. The Evaluation of Growth Performance, Photosynthetic Capacity, and Primary and Secondary Metabolite Content of Leaf Lettuce Grown under Limited Irradiation of Blue and Red LED Light in an Urban Plant Factory. *Agriculture* **2020**, *10*, 28, doi:10.3390/agriculture10020028.
  44. Park, J.-E.; Nakamura, K. Automatization, Labor-Saving and Employment in a Plant Factory. *Environ. Control Biol.* **2015**, *53*, 89–92, doi:10.2525/ecb.53.89.
  45. Wirz, H.; Sauer-Budge, A.F.; Briggs, J.; Sharpe, A.; Shu, S.; Sharon, A. Automated Production of Plant-Based Vaccines and Pharmaceuticals. *J. Lab. Autom.* **2012**, *17*, 449–457, doi:10.1177/2211068212460037.
  46. Blankenship, R.E.; Tiede, D.M.; Barber, J.; Brudvig, G.W.; Fleming, G.; Ghirardi, M.; Gunner, M.R.; Junge, W.; Kramer, D.M.; Melis, A.; et al. Comparing Photosynthetic and Photovoltaic Efficiencies and Recognizing the Potential for Improvement. *Science (80-. )* **2011**, *332*, 805–809, doi:10.1126/science.1200165.
  47. Kranz, S.; Frick, S. Efficient Cooling Energy Supply with Aquifer Thermal Energy Storages. *Appl. Energy* **2013**, *109*, 321–327, doi:10.1016/j.apenergy.2012.12.002.
  48. Xydis, G.A.; Liaros, S.; Avgoustaki, D.D. Small Scale Plant Factories with Artificial Lighting and Wind Energy Microgeneration: A Multiple Revenue Stream Approach. *J. Clean. Prod.* **2020**, *255*, 120227, doi:10.1016/j.jclepro.2020.120227.
  49. Forman, C.; Muritala, I.K.; Pardemann, R.; Meyer, B. Estimating the Global Waste Heat Potential. *Renew. Sustain. Energy Rev.* **2016**, *57*, 1568–1579, doi:10.1016/j.rser.2015.12.192.
  50. Quoilin, S.; Broek, M. Van Den; Declaye, S.; Dewallef, P.; Lemort, V. Techno-Economic Survey of Organic Rankine Cycle (ORC) Systems. *Renew. Sustain. Energy Rev.* **2013**, *22*, 168–186, doi:10.1016/j.rser.2013.01.028.
  51. Lefers, R.M.; Srivatsa Bettahalli, N.M.; Fedoroff, N. V.; Ghaffour, N.; Davies, P.A.; Nunes, S.P.; Leiknes, T. Hollow Fibre Membrane-Based Liquid Desiccant Humidity Control for Controlled Environment Agriculture. *Biosyst. Eng.* **2019**, *183*, 47–57, doi:10.1016/j.biosystemseng.2019.04.010.
  52. Yatskovskaya, E.; Srail, J.; Kumar, M. Integrated Supply Network Maturity Model: Water Scarcity Perspective. *Sustainability* **2018**, *10*, 896, doi:10.3390/su10030896.
  53. Flórez-Orrego, D.; de Oliveira Junior, S. On the Efficiency, Exergy Costs and CO<sub>2</sub> Emission Cost Allocation for an Integrated Syngas and Ammonia Production Plant. *Energy* **2016**, *117*, 341–360,

doi:10.1016/j.energy.2016.05.096.

54. Dalal, J.; Lopez, H.; Vasani, N.B.; Hu, Z.; Swift, J.E.; Yalamanchili, R.; Dvora, M.; Lin, X.; Xie, D.; Qu, R.; et al. A Photorespiratory Bypass Increases Plant Growth and Seed Yield in Biofuel Crop Camelina Sativa. *Biotechnol. Biofuels* **2015**, *8*, 175, doi:10.1186/s13068-015-0357-1.
55. Zhang, Y.; Yasutake, D.; Hidaka, K.; Kitano, M.; Okayasu, T. CFD Analysis for Evaluating and Optimizing Spatial Distribution of CO<sub>2</sub> Concentration in a Strawberry Greenhouse under Different CO<sub>2</sub> Enrichment Methods. *Comput. Electron. Agric.* **2020**, *179*, 105811, doi:10.1016/j.compag.2020.105811.
56. Lee, C.E.; Lee, Y.B.; Park, K.S. Growth, Quality and Leaf Pigmentation of Lettuce (*Lactuca Sativa* L.) in Plant Factory Systems and a Glasshouse. *Acta Hortic.* **2004**, *633*, 83–89, doi:10.17660/ActaHortic.2004.633.9.
57. Wei, M.; Xing, Y.; Wang, X.; Ma, H. CO<sub>2</sub> Environment In Solar Greenhouse In Northern China And Effects Of CO<sub>2</sub> Enrichment On Photosynthetic Rate And Dry Matter Production Of Cucumber. *Acta Hortic.* **2004**, *633*, 115–120, doi:10.17660/ActaHortic.2004.633.13.
58. Ryu, D.K.; Kang, S.W.; Ngo, V.D.; Chung, S.O.; Choi, J.M.; Park, S.U.; Kim, S.J. Control of Temperature, Humidity, and CO<sub>2</sub> Concentration in Small- Sized Experimental Plant Factory. *Acta Hortic.* **2014**, *1037*, 477–484, doi:10.17660/ActaHortic.2014.1037.59.
59. Manganello, A.; Moulaert, F. Scaling out Access to Land for Urban Agriculture. Governance Hybridities in the Brussels-Capital Region. *Land use policy* **2019**, *82*, 391–400, doi:10.1016/j.landusepol.2018.12.015.
60. Goodman, W.; Minner, J. Will the Urban Agricultural Revolution Be Vertical and Soilless? A Case Study of Controlled Environment Agriculture in New York City. *Land use policy* **2019**, *83*, 160–173, doi:10.1016/j.landusepol.2018.12.038.
61. Siswanto, D.; Widoretno, W. Design and Construction of a Vertical Hydroponic System with Semi-Continuous and Continuous Nutrient Cycling. In Proceedings of the AIP Conference Proceedings; 2017; Vol. 1908, p. 040001.
62. Ahlgren, S.; Baky, A.; Bernesson, S.; Nordberg, Å.; Norén, O.; Hansson, P.A. Ammonium Nitrate Fertiliser Production Based on Biomass - Environmental Effects from a Life Cycle Perspective. *Bioresour. Technol.* **2008**, *99*, 8034–8041, doi:10.1016/j.biortech.2008.03.041.
63. Ahlgren, S.; Bernesson, S.; Nordberg, Å.; Hansson, P.A. Nitrogen Fertiliser Production Based on Biogas - Energy Input, Environmental Impact and Land Use. *Bioresour. Technol.* **2010**, *101*, 7181–7184, doi:10.1016/j.biortech.2010.04.006.
64. Sánchez, A.; Martín, M. Scale up and Scale down Issues of Renewable Ammonia Plants: Towards Modular Design. *Sustain. Prod. Consum.* **2018**, *16*, 176–192, doi:10.1016/j.spc.2018.08.001.
65. Thompson, R.B.; Gallardo, M.; Voogt, W. Optimizing Nitrogen and Water Inputs for Greenhouse Vegetable Production. *Acta Hortic.* **2015**, *1107*, 15–30, doi:10.17660/ActaHortic.2015.1107.2.
66. Zhang, R.; Liu, T.; Ma, J. Plant Factory: A New Method for Reducing Carbon Emissions. In Proceedings of the AIP Conference Proceedings; 2017; Vol. 1820, p. 040016.
67. Shiina, T.; Hosokawa, D.; Roy, P.; Nakamura, N.; Thammarawong, M.; Orikasa, T. Life Cycle Inventory Analysis of Leafy Vegetables Grown in Two Types of Plant Factories. *Acta Hortic.* **2011**, *919*, 115–122, doi:10.17660/ActaHortic.2011.919.14.
68. Kim, D.G.; Lee, C.; Yun, Y.-S.; Hong, C.-H.; Choi, Y.-E. Recycling Waste Nutrient Solution Originating from the Plant Factory with the Cultivation of Newly Isolated *Acutodesmus* Species. *J. Biotechnol.* **2019**, *289*, 15–25, doi:10.1016/j.jbiotec.2018.10.010.
69. Kumar, R.R.; Cho, J.Y. Reuse of Hydroponic Waste Solution. *Environ. Sci. Pollut. Res.* **2014**, *21*, 9569–9577, doi:10.1007/s11356-014-3024-3.

70. Riikonen, J.; Luoranen, J. Use of Short-Day Treatment in the Production of Norway Spruce Mini-Plug Seedlings under Plant Factory Conditions. *Scand. J. For. Res.* **2018**, *33*, 625–632, doi:10.1080/02827581.2018.1492011.
71. Gentry, M. Local Heat, Local Food: Integrating Vertical Hydroponic Farming with District Heating in Sweden. *Energy* **2019**, *174*, 191–197, doi:10.1016/j.energy.2019.02.119.
72. Nguyen Quang, T.; Iwamura, K.; Shrestha, R.; Sugimura, N. A Study on Supercooled Storage of Leaf Lettuces Produced in Plant Factory. *Japan J. Food Eng.* **2017**, *18*, 25–32, doi:10.11301/jsfe.16473.
73. Srail, J.S.; Tsolakis, N.; Kumar, M.; Bam, W. Circular Supply Chains and Renewable Chemical Feedstocks: A Network Configuration Analysis Framework. *Prod. Plan. Control* **2018**, *29*, 464–482, doi:10.1080/09537287.2018.1449263.
74. Parker, N.; Tittmann, P.; Hart, Q.; Nelson, R.; Skog, K.; Schmidt, A.; Gray, E.; Jenkins, B. Development of a Biorefinery Optimized Biofuel Supply Curve for the Western United States. *Biomass and Bioenergy* **2010**, *34*, 1597–1607, doi:10.1016/j.biombioe.2010.06.007.
75. Singh, R.; Kemausuor, F.; Wooldridge, M. Locational Analysis of Cellulosic Ethanol Production and Distribution Infrastructure for the Transportation Sector in Ghana. *Renew. Sustain. Energy Rev.* **2018**, *98*, 393–406, doi:10.1016/j.rser.2018.09.017.
76. Bam, W.; De Bruyne, K. Location Policy and Downstream Mineral Processing: A Research Agenda. *Extr. Ind. Soc.* **2017**, *4*, 443–447, doi:10.1016/j.exis.2017.06.009.
77. de Jong, E.; Higson, A.; Walsh, P.; Wellisch, M. Task 42 Biobased Chemicals - Value Added Products from Biorefineries Available online: <https://task42.ieabioenergy.com/publications/biobased-chemicals/> (accessed on 15 November 2020).
78. Souza, S.V.; Gimenes, R.M.T.; Binotto, E. Economic Viability for Deploying Hydroponic System in Emerging Countries: A Differentiated Risk Adjustment Proposal. *Land use policy* **2019**, *83*, 357–369, doi:10.1016/j.landusepol.2019.02.020.
79. An, H.; Wilhelm, W.E.; Searcy, S.W. A Mathematical Model to Design a Lignocellulosic Biofuel Supply Chain System with a Case Study Based on a Region in Central Texas. *Bioresour. Technol.* **2011**, *102*, 7860–7870, doi:10.1016/j.biortech.2011.05.060.
80. Koistinen, K.; Upham, P.; Bögel, P. Stakeholder Signalling and Strategic Niche Management: The Case of Aviation Biokerosene. *J. Clean. Prod.* **2019**, *225*, 72–81, doi:10.1016/j.jclepro.2019.03.283.
81. Tsolakis, N.; Bam, W.; Srail, J.S.; Kumar, M. Renewable Chemical Feedstock Supply Network Design: The Case of Terpenes. *J. Clean. Prod.* **2019**, *222*, 802–822, doi:10.1016/j.jclepro.2019.02.108.
82. Kim, J.; Realff, M.J.; Lee, J.H. Optimal Design and Global Sensitivity Analysis of Biomass Supply Chain Networks for Biofuels under Uncertainty. *Comput. Chem. Eng.* **2011**, *35*, 1738–1751, doi:10.1016/j.compchemeng.2011.02.008.
83. Tsolakis, N.; Srail, J.S. Mapping Supply Dynamics in Renewable Feedstock Enabled Industries: A Systems Theory Perspective on ‘Green’ Pharmaceuticals. *Oper. Manag. Res.* **2018**, *11*, 83–104, doi:10.1007/s12063-018-0134-y.
84. Walther, G.; Schatka, A.; Spengler, T.S. Design of Regional Production Networks for Second Generation Synthetic Bio-Fuel - A Case Study in Northern Germany. *Eur. J. Oper. Res.* **2012**, *218*, 280–292, doi:10.1016/j.ejor.2011.09.050.
85. Dauda, A.B.; Ajadi, A.; Tola-Fabunmi, A.S.; Akinwale, A.O. Waste Production in Aquaculture: Sources, Components and Managements in Different Culture Systems. *Aquac. Fish.* **2019**, *4*, 81–88, doi:10.1016/j.aaf.2018.10.002.
86. Scott, N.R.; Rutzke, C.J.; Albright, L.D. Energy Conversion Options for Energy-Efficient Controlled Environment Agriculture. *HortScience* **2005**, *40*, 287–292, doi:10.21273/HORTSCI.40.2.287.

87. Janes, H.; Cavazzoni, J.; Alagappan, G.; Specca, D.; Willis, J. Landfill Gas to Energy: A Demonstration Controlled Environment Agriculture System. *HortScience* **2005**, *40*, 279–282, doi:10.21273/HORTSCI.40.2.279.
88. Du, X.; Lu, L.; Zilberman, D. Vertical Integration or Contract Farming on Biofuel Feedstock Production: A Technology Innovation Perspective. In Proceedings of the Agricultural & Applied Economics Association's 2013 AAEA & CAES Joint Annual Meeting; 2013; pp. 1–22.
89. Spinelli, R.; Pari, L.; Magagnotti, N. New Biomass Products, Small-Scale Plants and Vertical Integration as Opportunities for Rural Development. *Biomass and Bioenergy* **2018**, *115*, 244–252, doi:10.1016/j.biombioe.2018.05.004.
90. Cardoso, T.F.; Chagas, M.F.; Rivera, E.C.; Cavalett, O.; Morais, E.R.; Geraldo, V.C.; Braunbeck, O.; da Cunha, M.P.; Cortez, L.A.B.; Bonomi, A. A Vertical Integration Simplified Model for Straw Recovery as Feedstock in Sugarcane Biorefineries. *Biomass and Bioenergy* **2015**, *81*, 216–223, doi:10.1016/j.biombioe.2015.07.003.
91. Bogachev, D. V. Transformation of the Agriculture in Russia: Significance of Present-Day Vertical Integration. *Reg. Res. Russ.* **2015**, *5*, 392–401, doi:10.1134/S2079970515040073.
92. Huang, P.C.C. China's New-Age Small Farms and Their Vertical Integration: Agribusiness or Co-Ops? *Mod. China* **2011**, *37*, 107–134, doi:10.1177/0097700410396476.
93. Yang, M.; Baral, N.R.; Simmons, B.A.; Mortimer, J.C.; Shih, P.M.; Scown, C.D. Accumulation of High-Value Bioproducts in Planta Can Improve the Economics of Advanced Biofuels. *Proc. Natl. Acad. Sci.* **2020**, *117*, 8639–8648, doi:10.1073/pnas.2000053117.
94. Dodd, T.; Orlitzky, M.; Nelson, T. What Stalls a Renewable Energy Industry? Industry Outlook of the Aviation Biofuels Industry in Australia, Germany, and the USA. *Energy Policy* **2018**, *123*, 92–103, doi:10.1016/j.enpol.2018.08.048.
95. Baudry, G.; Delrue, F.; Legrand, J.; Pruvost, J.; Vallée, T. The Challenge of Measuring Biofuel Sustainability: A Stakeholder-Driven Approach Applied to the French Case. *Renew. Sustain. Energy Rev.* **2017**, *69*, 933–947, doi:10.1016/j.rser.2016.11.022.
96. Giarola, S.; Bezzo, F.; Shah, N. A Risk Management Approach to the Economic and Environmental Strategic Design of Ethanol Supply Chains. *Biomass and Bioenergy* **2013**, *58*, 31–51, doi:10.1016/j.biombioe.2013.08.005.
97. Settanni, E.; Harrington, T.S.; Srai, J.S. Pharmaceutical Supply Chain Models: A Synthesis from a Systems View of Operations Research. *Oper. Res. Perspect.* **2017**, *4*, 74–95, doi:10.1016/j.orp.2017.05.002.
98. Wang, M.; Jie, F. Managing Supply Chain Uncertainty and Risk in the Pharmaceutical Industry. *Heal. Serv. Manag. Res.* **2020**, *33*, 156–164, doi:10.1177/0951484819845305.
99. Peidro, D.; Mula, J.; Poler, R.; Lario, F.-C. Quantitative Models for Supply Chain Planning under Uncertainty: A Review. *Int. J. Adv. Manuf. Technol.* **2009**, *43*, 400–420, doi:10.1007/s00170-008-1715-y.
100. Silva, N.; Ferreira, L.M.D.F.; Silva, C.; Magalhães, V.; Neto, P. Improving Supply Chain Visibility With Artificial Neural Networks. *Procedia Manuf.* **2017**, *11*, 2083–2090, doi:10.1016/j.promfg.2017.07.329.
101. Neuling, U.; Kaltschmitt, M. Techno-Economic and Environmental Analysis of Aviation Biofuels. *Fuel Process. Technol.* **2018**, *171*, 54–69, doi:10.1016/j.fuproc.2017.09.022.
102. Funke, T.; Klein, P.; Meyer, F. Biofuel Production in South Africa. *Biofuels* **2011**, *2*, 209–220, doi:10.4155/bfs.11.3.
103. Perkis, D.F.; Tyner, W.E. Developing a Cellulosic Aviation Biofuel Industry in Indiana: A Market and Logistics Analysis. *Energy* **2018**, *142*, 793–802, doi:10.1016/j.energy.2017.10.022.
104. Sadrul Islam, A.K.M.; Ahiduzzaman, M. Biomass Energy: Sustainable Solution for Greenhouse Gas Emission. In Proceedings of the AIP Conference Proceedings; 2012; Vol. 1440, pp. 23–32.
105. Gómez, C.; Currey, C.J.; Dickson, R.W.; Kim, H.-J.; Hernández, R.; Sabeh, N.C.; Raudales, R.E.; Brumfield, R.G.;

- Laury-Shaw, A.; Wilke, A.K.; et al. Controlled Environment Food Production for Urban Agriculture. *HortScience* **2019**, *54*, 1448–1458, doi:10.21273/HORTSCI14073-19.
106. Rosales-Calderon, O.; Arantes, V. A Review on Commercial-Scale High-Value Products That Can Be Produced alongside Cellulosic Ethanol. *Biotechnol. Biofuels* **2019**, *12*, 240, doi:10.1186/s13068-019-1529-1.
  107. Kaufman, J.; Kalaitzandonakes, N. The Economic Potential of Plant-Made Pharmaceuticals in the Manufacture of Biologic Pharmaceuticals. *J. Commer. Biotechnol.* **2011**, *17*, 173–182, doi:10.1057/jcb.2010.37.
  108. Cai, C.M.; Zhang, T.; Kumar, R.; Wyman, C.E. Integrated Furfural Production as a Renewable Fuel and Chemical Platform from Lignocellulosic Biomass. *J. Chem. Technol. Biotechnol.* **2014**, *89*, 2–10, doi:10.1002/jctb.4168.
  109. Isikgor, F.H.; Becer, C.R. Lignocellulosic Biomass: A Sustainable Platform for the Production of Bio-Based Chemicals and Polymers. *Polym. Chem.* **2015**, *6*, 4497–4559, doi:10.1039/C5PY00263J.
  110. Turner & Townsend International Construction Market Survey 2019 Available online: [www.turnerandtowntsend.com](http://www.turnerandtowntsend.com) (accessed on 23 August 2022).
  111. Baumont de Oliveira, F.J.; Ferson, S.; Dyer, R.A.D.; Thomas, J.M.H.; Myers, P.D.; Gray, N.G. How High Is High Enough? Assessing Financial Risk for Vertical Farms Using Imprecise Probability. *Sustainability* **2022**, *14*, 5676, doi:10.3390/su14095676.
  112. Eskom Tariffs and Charges Available online: [https://www.eskom.co.za/distribution/wp-content/uploads/2022/03/Schedule-of-standard-prices-2022\\_23.pdf](https://www.eskom.co.za/distribution/wp-content/uploads/2022/03/Schedule-of-standard-prices-2022_23.pdf) (accessed on 7 September 2022).
  113. Brouwer, C.; Heibloem, M. *Chapter 3: Crop Water Needs. Irrigation Water Management: Irrigation Water Needs*; 1986;
  114. Thomson, A.; Price, G.W.; Arnold, P.; Dixon, M.; Graham, T. Review of the Potential for Recycling CO<sub>2</sub> from Organic Waste Composting into Plant Production under Controlled Environment Agriculture. *J. Clean. Prod.* **2022**, *333*, 130051, doi:10.1016/j.jclepro.2021.130051.
  115. Weather Spark Climate and Average Weather Year Round in Cape Town Available online: <https://weatherspark.com/y/82961/Average-Weather-in-Cape-Town-South-Africa-Year-Round> (accessed on 27 September 2022).
  116. Urban Cultivation International Plant Factory Available online: <https://www.urbancultivation.co.za/online-store/Plant-Factory-p205320211> (accessed on 30 August 2022).
  117. HydroBuilder Agrowtek GrowControl Available online: <https://hydrobuilder.com/agrowtek-growcontrol-bdx-batchmatic-fertigation-system-with-peristaltic-pumps.html> (accessed on 21 September 2022).
  118. HydroBuilder AgrowTeck Vertical Batch Tank Available online: <https://hydrobuilder.com/agrowtek-vbt-vertical-batch-tank-stand-for-bdx-batchmatic-fertigation-system.html> (accessed on 21 September 2022).
  119. HydroBuilder Hydro-X PRO Environmental Control System Available online: [https://hydrobuilder.com/trolmaster-hydro-x-pro-controller.html?copts=select\\_102950%3A291440](https://hydrobuilder.com/trolmaster-hydro-x-pro-controller.html?copts=select_102950%3A291440) (accessed on 8 September 2022).
  120. Salary Expert Farm Manager Available online: <https://www.salaryexpert.com/salary/job/farm-manager/south-africa/cape-town> (accessed on 16 September 2022).
  121. Salary Expert Arborist Available online: <https://www.salaryexpert.com/salary/job/arborist/south-africa/cape-town> (accessed on 16 September 2022).
  122. Salary Expert Cleaner Available online: <https://www.salaryexpert.com/salary/job/cleaner/south-africa/cape-town> (accessed on 16 September 2022).
  123. Salary Expert Office Administrator Available online: <https://www.salaryexpert.com/salary/job/office-administrator/south-africa/cape-town> (accessed on 16 September 2022).
  124. Salary Expert Marketing Associate Available online: <https://www.salaryexpert.com/salary/job/marketing->

- associate/south-africa/cape-town (accessed on 16 September 2022).
125. Salary Expert Harvest Hand Available online: <https://www.salaryexpert.com/salary/job/harvest-hand/south-africa/cape-town> (accessed on 16 September 2022).
  126. Expatica Minimum Wage in South Africa: How Much Should You Earn? Available online: <https://www.expatica.com/za/working/employment-law/minimum-wage-in-south-africa-982321/> (accessed on 16 September 2022).
  127. HydroBuilder Agrify Available online: <https://www.agrify.com/led-grow-lights/> (accessed on 30 August 2022).
  128. City of Cape Town *Water Comsumptive Tariffs*; City of Cape Town, 2022;
  129. HydroBuilder HGV Nutrients Complete Nutrient Package Available online: <https://hydrobuilder.com/nutrients-and-fertilizer/nutrient-packages-72/hydroponic-nutrient-packages/hgv-nutrients-complete-nutrient-package.html> (accessed on 9 September 2022).
  130. HydroBuilder VidaWool Rockwool Slab Available online: <https://hydrobuilder.com/hydroponics/hydroponic-grow-media/vidawool-rockwool-slab.html> (accessed on 29 September 2022).
  131. HydroBuilder VidaWool Rockwool Block Available online: <https://hydrobuilder.com/hydroponics/hydroponic-grow-media/rockwool-1309/rockwool-blocks/vidawool-rockwool-block.html> (accessed on 9 September 2022).
  132. HydroBuilder Hydroponic Grow Media Available online: <https://hydrobuilder.com/hydroponics/hydroponic-grow-media.html> (accessed on 9 September 2022).
  133. Alibaba Brewers Grains Available online: [https://www.alibaba.com/product-detail/BEER-RESIDUE-BREWERS-GRAINS-FOR-RUMINANTS\\_1600074356362.html](https://www.alibaba.com/product-detail/BEER-RESIDUE-BREWERS-GRAINS-FOR-RUMINANTS_1600074356362.html) (accessed on 14 October 2022).
  134. Engineering ToolBox Food Products - Bulk Densities Available online: [https://www.engineeringtoolbox.com/foods-materials-bulk-density-d\\_1819.html](https://www.engineeringtoolbox.com/foods-materials-bulk-density-d_1819.html) (accessed on 14 October 2022).
  135. Seeds for Africa Moneymaker Tomato - Lycopersicon Esculentum - Vegetable - 50 Seeds Available online: [https://www.seedsforafrica.co.za/products/money-maker-tomato-lycopersicon-esculentum-vegetable-50-seeds?\\_pos=3&\\_sid=77b5ed7f8&\\_ss=r](https://www.seedsforafrica.co.za/products/money-maker-tomato-lycopersicon-esculentum-vegetable-50-seeds?_pos=3&_sid=77b5ed7f8&_ss=r) (accessed on 26 September 2022).
  136. Seeds for Africa Salad Bowl Green Lettuce - Lactuca Sativa - Vegetable - 200 Seeds - ORGANIC Available online: <https://www.seedsforafrica.co.za/collections/vegetable-seeds/products/salad-bowl-green-lettuce-lactuca-sativa-vegetable-200-seeds-organic> (accessed on 26 September 2022).
  137. Seeds for Africa Virginia Gold Tobacco - Nicotiana Tabaccum - 20 Seeds Available online: [https://www.seedsforafrica.co.za/products/virginia-gold-tobacco-nicotiana-tabaccum-20-seeds?\\_pos=1&\\_sid=3906c1fee&\\_ss=r](https://www.seedsforafrica.co.za/products/virginia-gold-tobacco-nicotiana-tabaccum-20-seeds?_pos=1&_sid=3906c1fee&_ss=r) (accessed on 26 September 2022).
  138. WeedSeedsExpress Cannabis Seeds Price List Available online: <https://weedseedsexpress.com/price-list-cannabis-seeds> (accessed on 26 September 2022).
  139. Neveln, V. Tomato Available online: <https://www.bhg.com/gardening/plant-dictionary/vegetable/tomato/> (accessed on 23 October 2021).
  140. Hirai, T.; Fukukawa, G.; Kakuta, H.; Fukuda, N.; Ezura, H. Production of Recombinant Miraculin Using Transgenic Tomatoes in a Closed Cultivation System. *J. Agric. Food Chem.* **2010**, *58*, 6096–6101, doi:10.1021/jf100414v.
  141. Neveln, V. Lettuce Available online: <https://www.bhg.com/gardening/plant-dictionary/vegetable/lettuce/> (accessed on 23 October 2021).
  142. Grisan, S.; Polizzotto, R.; Raiola, P.; Cristiani, S.; Ventura, F.; di Lucia, F.; Zuin, M.; Tommasini, S.; Morbidelli, R.; Damiani, F.; et al. Alternative Use of Tobacco as a Sustainable Crop for Seed Oil, Biofuel, and Biomass. *Agron. Sustain. Dev.* **2016**, *36*, 55, doi:10.1007/s13593-016-0395-5.

143. Bohmert-Tatarev, K.; McAvoy, S.; Daughtry, S.; Peoples, O.P.; Snell, K.D. High Levels of Bioplastic Are Produced in Fertile Transplastomic Tobacco Plants Engineered with a Synthetic Operon for the Production of Polyhydroxybutyrate. *Plant Physiol.* **2011**, *155*, 1690–1708, doi:10.1104/pp.110.169581.
144. Nagatoshi, Y.; Ikeda, M.; Kishi, H.; Hiratsu, K.; Muraguchi, A.; Ohme-Takagi, M. Induction of a Dwarf Phenotype with IBH1 May Enable Increased Production of Plant-Made Pharmaceuticals in Plant Factory Conditions. *Plant Biotechnol. J.* **2016**, *14*, 887–894, doi:10.1111/pbi.12437.
145. Naim-Feil, E.; Pembleton, L.W.; Spooner, L.E.; Malthouse, A.L.; Miner, A.; Quinn, M.; Polotnianka, R.M.; Baillie, R.C.; Spangenberg, G.C.; Cogan, N.O.I. The Characterization of Key Physiological Traits of Medicinal Cannabis (*Cannabis Sativa* L.) as a Tool for Precision Breeding. *BMC Plant Biol.* **2021**, *21*, 294, doi:10.1186/s12870-021-03079-2.
146. Kato, K.; Yoshida, R.; Kikuzaki, A.; Hirai, T.; Kuroda, H.; Hiwasa-Tanase, K.; Takane, K.; Ezura, H.; Mizoguchi, T. Molecular Breeding of Tomato Lines for Mass Production of Miraculin in a Plant Factory. *J. Agric. Food Chem.* **2010**, *58*, 9505–9510, doi:10.1021/jf101874b.
147. Hiwasa-Tanase, K.; Ezura, H. Molecular Breeding to Create Optimized Crops: From Genetic Manipulation to Potential Applications in Plant Factories. *Front. Plant Sci.* **2016**, *7*, 1–7, doi:10.3389/fpls.2016.00539.
148. Walmart MiralandBerry Miracle Fruit, Miracle Berry (10 Whole Berries), Freeze Dried Available online: <https://www.walmart.com/ip/MiralandBerry-Miracle-Fruit-Miracle-Berry-10-Whole-Berries-Freeze-Dried/150342552> (accessed on 29 September 2022).
149. Hiwasa-Tanase, K.; Hirai, T.; Kato, K.; Duhita, N.; Ezura, H. From Miracle Fruit to Transgenic Tomato: Mass Production of the Taste-Modifying Protein Miraculin in Transgenic Plants. *Plant Cell Rep.* **2012**, *31*, 513–525, doi:10.1007/s00299-011-1197-5.
150. PubChem Sucrose Available online: <https://pubchem.ncbi.nlm.nih.gov/compound/sucrose> (accessed on 1 October 2022).
151. Woolworths White Sugar 2.5 Kg Available online: [https://www.woolworths.co.za/prod/\\_/A-20003272](https://www.woolworths.co.za/prod/_/A-20003272) (accessed on 1 October 2022).
152. Checkers Huletts White Sugar 500g Available online: <https://www.checkers.co.za/All-Departments/Food/Food-Cupboard/Sugar-and-Sweeteners/White-Sugar/Huletts-White-Sugar-500g/p/10133855EA> (accessed on 1 October 2022).
153. Martin, M.; Poulikidou, S.; Molin, E. Exploring the Environmental Performance of Urban Symbiosis for Vertical Hydroponic Farming. *Sustainability* **2019**, *11*, 6724, doi:10.3390/su11236724.
154. Riera-Vila, I.; Anderson, N.O.; Hodge, C.F.; Rogers, M. Anaerobically-Digested Brewery Wastewater as a Nutrient Solution for Substrate-Based Food Production. *Horticulturae* **2019**, *5*, 43, doi:10.3390/horticulturae5020043.
155. Joburg Market Daily Prices Available online: <http://www.joburgmarket.co.za/dailyprices.php> (accessed on 21 October 2021).
156. FAO FAOSTAT Available online: <https://www.fao.org/faostat/en/#data/PP> (accessed on 24 October 2021).
157. Green Heart Organics Tomatoes (Cherry on the Vine) (+300g) Available online: [https://greenheartorganics.co.za/product/cherry\\_on\\_vine/](https://greenheartorganics.co.za/product/cherry_on_vine/) (accessed on 29 September 2022).
158. Woolworths Israeli Tomatoes 6 Pk Available online: [https://www.woolworths.co.za/prod/Food/Fruit-Vegetables-Salads/Salads-Herbs/Tomatoes/Israeli-Tomatoes-6-pk/\\_/A-20003951?isFromPLP=true](https://www.woolworths.co.za/prod/Food/Fruit-Vegetables-Salads/Salads-Herbs/Tomatoes/Israeli-Tomatoes-6-pk/_/A-20003951?isFromPLP=true) (accessed on 29 September 2022).
159. Woolworths Salad Tomatoes 1 Kg Available online: <https://www.woolworths.co.za/prod/Food/Fruit->

- Vegetables-Salads/Salads-Herbs/Tomatoes/Salad-Tomatoes-1-kg/\_/A-20090012?isFromPLP=true (accessed on 29 September 2022).
160. Hirai, T.; Kurokawa, N.; Duhita, N.; Hiwasa-Tanase, K.; Kato, K.; Kato, K.; Ezura, H. The HSP Terminator of *Arabidopsis Thaliana* Induces a High Level of Miraculin Accumulation in Transgenic Tomatoes. *J. Agric. Food Chem.* **2011**, *59*, 9942–9949, doi:10.1021/jf202501e.
  161. Green Heart Organics Lettuce (Mixed Baby Leaf) (+200g) Available online: <https://greenheartorganics.co.za/product/babyleaf/> (accessed on 29 September 2022).
  162. Woolworths Pick & Mix Solo Leaf Butter Lettuce 300 G Available online: [https://www.woolworths.co.za/prod/Food/Fruit-Vegetables-Salads/Salads-Herbs/Lettuce-Mixed-Leaves/Pick-Mix-Solo-Leaf-Butter-Lettuce-300-g/\\_/A-6005000178005](https://www.woolworths.co.za/prod/Food/Fruit-Vegetables-Salads/Salads-Herbs/Lettuce-Mixed-Leaves/Pick-Mix-Solo-Leaf-Butter-Lettuce-300-g/_/A-6005000178005) (accessed on 9 September 2022).
  163. Sun, H.-J.; Cui, M.; Ma, B.; Ezura, H. Functional Expression of the Taste-Modifying Protein, Miraculin, in Transgenic Lettuce. *FEBS Lett.* **2006**, *580*, 620–626, doi:10.1016/j.febslet.2005.12.080.
  164. Carvalho, F.S.; Fornasier, F.; Leitão, J.O.M.; Moraes, J.A.R.; Schneider, R.C.S. Life Cycle Assessment of Biodiesel Production from Solaris Seed Tobacco. *J. Clean. Prod.* **2019**, *230*, 1085–1095, doi:10.1016/j.jclepro.2019.05.177.
  165. Fatica, A.; Di Lucia, F.; Marino, S.; Alvino, A.; Zuin, M.; De Feijter, H.; Brandt, B.; Tommasini, S.; Fantuz, F.; Salimei, E. Study on Analytical Characteristics of *Nicotiana Tabacum* L., Cv. Solaris Biomass for Potential Uses in Nutrition and Biomethane Production. *Sci. Rep.* **2019**, *9*, 16828, doi:10.1038/s41598-019-53237-8.
  166. Moscariello, C.; Matassa, S.; Esposito, G.; Papirio, S. From Residue to Resource: The Multifaceted Environmental and Bioeconomy Potential of Industrial Hemp (*Cannabis Sativa* L.). *Resour. Conserv. Recycl.* **2021**, *175*, 105864, doi:10.1016/j.resconrec.2021.105864.
  167. Meher, K.K.; Panchwagh, A.M.; Rangrass, S.; Gollakota, K.G. Biomethanation of Tobacco Waste. *Environ. Pollut.* **1995**, *90*, 199–202, doi:10.1016/0269-7491(94)00107-O.
  168. Malhotra, K.; Subramaniam, M.; Rawat, K.; Kalamuddin, M.; Qureshi, M.I.; Malhotra, P.; Mohammed, A.; Cornish, K.; Daniell, H.; Kumar, S. Compartmentalized Metabolic Engineering for Artemisinin Biosynthesis and Effective Malaria Treatment by Oral Delivery of Plant Cells. *Mol. Plant* **2016**, *9*, 1464–1477, doi:10.1016/j.molp.2016.09.013.
  169. Statista Price of Polypropylene Worldwide from 2017 to 2022 Available online: <https://www.statista.com/statistics/1171084/price-polypropylene-forecast-globally/> (accessed on 28 August 2022).
  170. Lopez-Arenas, T.; González-Contreras, M.; Anaya-Reza, O.; Sales-Cruz, M. Analysis of the Fermentation Strategy and Its Impact on the Economics of the Production Process of PHB (Polyhydroxybutyrate). *Comput. Chem. Eng.* **2017**, *107*, 140–150, doi:10.1016/j.compchemeng.2017.03.009.
  171. Antibodies Hepatitis B Virus Antibody Available online: <https://www.antibodies-online.com/antibody/5579718/anti-Hepatitis+B+Virus+HBV+antibody/> (accessed on 7 October 2022).
  172. Antibodies Hepatitis B Virus Antibody Available online: <https://www.antibodies-online.com/antibody/3027643/anti-Hepatitis+B+Virus+HBV+antibody/> (accessed on 7 October 2022).
  173. Matassa, S.; Esposito, G.; Pirozzi, F.; Papirio, S. Exploring the Biomethane Potential of Different Industrial Hemp (*Cannabis Sativa* L.) Biomass Residues. *Energies* **2020**, *13*, 3361, doi:10.3390/en13133361.
  174. Cannabis Benchmarks Canada Cannabis Spot Index Available online: <https://www.cannabisbenchmarks.com/reports/canada-cannabis-spot-index-august-26-2022/> (accessed on 26 August 2022).
  175. Cannabis Benchmarks U.S. Cannabis Spot Index Available online:

<https://www.cannabisbenchmarks.com/reports/u-s-cannabis-spot-index-august-26-2022/> (accessed on 26 August 2022).
